# Supplementary material for: Fish functional groups of the North Atlantic and Arctic Oceans
Source: Copernicus journal article supplement (doi:10.5194/essd-2024-102), 2024-06-17
Supplement: Supplementary file 1 [file essd-2024-102-supplement.pdf]

1 **Supporting Material**

2

3 **Fish functional groups of the North Atlantic and Arctic Oceans**

4 **Authors:** Murray S.A. Thompson<sup>1</sup>, Izaskun Preciado<sup>2</sup>, Federico Maioli<sup>3,4,5</sup>, Valerio Bartolino<sup>3</sup>, Andrea  
5 Belgrano<sup>3,5,6</sup>, Michele Casini<sup>3,5</sup>, Pierre Cresson<sup>7</sup>, Elena Eriksen<sup>8</sup>, Gema Hernandez-Milian<sup>9</sup>, Ingibjörg G.  
6 Jónsdóttir<sup>10</sup>, Stefan Neuenfeldt<sup>11</sup>, John K. Pinnegar<sup>1</sup>, Stefán Ragnarsson<sup>10</sup>, Sabine Schückerl<sup>12,13</sup>, Ulrike  
7 Schückerl<sup>13</sup>, Brian E. Smith<sup>14</sup>, María Ángeles Torres<sup>15</sup>, Thomas J. Webb<sup>16</sup>, and Christopher P. Lynam<sup>1</sup>

8 **Correspondence:** murray.thompson@cefas.gov.uk

9

10 <sup>1</sup> Centre for Environment, Fisheries and Aquaculture Science (Cefas), Lowestoft Laboratory, Pakefield  
11 Road, Lowestoft, Suffolk, NR33 0HT, UK

12 <sup>2</sup> Instituto Español de Oceanografía (IEO-CSIC), Centro Oceanográfico de Santander, Severiano  
13 Ballesteros 16 39004 Santander, Spain

14 <sup>3</sup> Department of Aquatic Resources, Institute of Marine Research, Swedish University of Agricultural  
15 Sciences, Turistgatan 5, SE-45330 Lysekil, Sweden.

16 <sup>4</sup> University of Bologna, Department of Biological, Geological and Environmental Sciences, Laboratory  
17 of Marine Biology and Fisheries, Viale Adriatico 1/N, 61032 Fano, Italy

18 <sup>5</sup> Swedish Institute for the Marine Environment (SIME), University of Gothenburg, Seminariegatan 1F,  
19 SE-41313 Gothenburg, Sweden

20 <sup>6</sup> Gothenburg Global Biodiversity Centre, University of Gothenburg, P.O. Box 463, SE-405 30  
21 Gothenburg, Sweden

22 <sup>7</sup> IFREMER, Channel and North Sea Fisheries Research Unit, 150 Quai Gambetta F-62200 Boulogne sur  
23 Mer, France

24 <sup>8</sup> Institute of Marine Research, Bergen, Norway

25 <sup>9</sup> Centre Oceanographic Vigo-Spanish National Research Council (COV-CSIC), Subida Radio Faro 50,  
26 36390 Vigo, Spain

27 <sup>10</sup> Marine and Freshwater Research Institute, Fornubúðum 5, 220 Hafnarfjörður, Iceland

1 <sup>11</sup> National Institute of Aquatic Resources, Technical University of Denmark, Lyngby, Denmark

2 <sup>12</sup> BioConsult GmbH & Co KG. Auf der Muggenburg 30, 28217 Bremen, Germany

3 <sup>13</sup> Schleswig-Holstein Agency for Coastal Defence, National Park and Marine Conservation, National  
4 Park Authority, Schlossgarten 1, 25832 Tönning, Germany

5 <sup>14</sup> Northeast Fisheries Science Center, National Marine Fisheries Service, National Oceanic and  
6 Atmospheric Administration, Woods Hole, MA 02543, USA

7 <sup>15</sup> Instituto Español de Oceanografía, Centro Oceanográfico de Cádiz, Puerto Pesquero, Muelle de  
8 Levante s/n, 11006, Cadiz (Andalusia), Spain

9 <sup>16</sup> Ecology and Evolutionary Biology, School of Biosciences, University of Sheffield, Sheffield S10 2TN

10

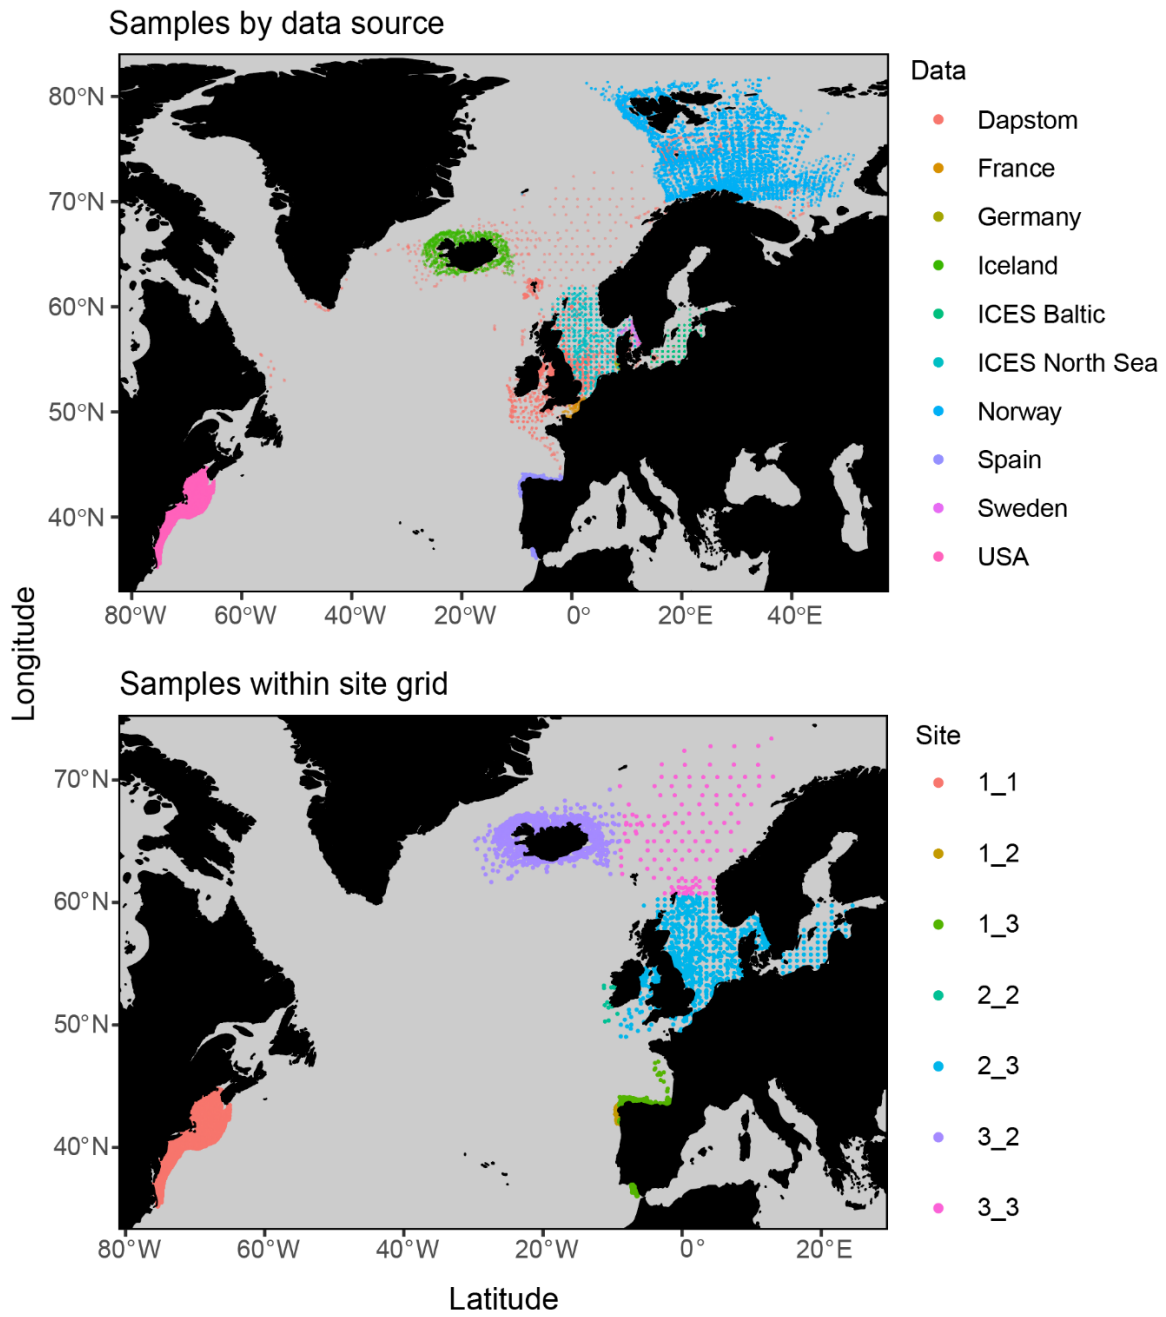

Figure S1: The sample distribution of different data sources and by site (see Table 1).

1  
2  
3  
4  
5  
6  
7  
8  
9  
10  
11  
12  
13  
14

1 Table S1. AIC values for the full (top row) and nested models to assess the importance of all random  
 2 effects. The term dropped indicates which term from the model was removed from the model above.  
 3 \* denotes an interaction with  $\log_{10}$ (predator weight), i.e., random slope and intercept, others are all  
 4 random intercepts only.

|                        |         |
|------------------------|---------|
| Termed dropped         | AIC     |
|                        | 1051829 |
| n stomachs             | 1052150 |
| Site                   | 1056090 |
| Year                   | 1075564 |
| Data                   | 1076274 |
| Prey functional group* | 1194755 |
| Predator taxa*         | 1364124 |

6  
 7 Table S2. Body size bins,  $\log_{10}$  transformed body mass in grams,  $\log_{10}$  transformed bin width and  
 8 minimum and maximum body masses in grams of organisms by size bin.

| Size bin | Log10(g) | Bin width | Min g    | Max g    |
|----------|----------|-----------|----------|----------|
| 1        | -7.579   | 0.813     | 1.03E-08 | 6.73E-08 |
| 2        | -6.765   | 0.813     | 6.73E-08 | 4.38E-07 |
| 3        | -5.952   | 0.813     | 4.38E-07 | 2.85E-06 |
| 4        | -5.139   | 0.813     | 2.85E-06 | 1.85E-05 |
| 5        | -4.326   | 0.813     | 1.85E-05 | 1.20E-04 |
| 6        | -3.513   | 0.813     | 1.20E-04 | 7.83E-04 |
| 7        | -2.699   | 0.813     | 7.83E-04 | 0.005095 |
| 8        | -1.886   | 0.813     | 0.005095 | 0.033139 |
| 9        | -1.073   | 0.813     | 0.033139 | 0.215543 |
| 10       | -0.260   | 0.813     | 0.215543 | 1.401963 |
| 11       | 0.553    | 0.813     | 1.401963 | 9.11881  |
| 12       | 1.367    | 0.813     | 9.11881  | 59.31163 |
| 13       | 2.180    | 0.813     | 59.31163 | 385.7816 |
| 14       | 2.993    | 0.813     | 385.7816 | 2509.246 |
| 15       | 3.806    | 0.813     | 2509.246 | 16320.93 |
| 16       | 4.619    | 0.813     | 16320.93 | 106156.5 |
| 17       | 5.433    | 0.813     | 106156.5 | 690475.5 |
| 18       | 6.246    | 0.813     | 690475.5 | 4491071  |
| 19       | 7.059    | 0.813     | 4491071  | 29211349 |
| 20       | 7.872    | 0.813     | 29211349 | 1.9E+08  |

9

1 Table S3. Data used to generate trait-based feeding guilds and produce Fig. 4. Taxa, size bin, distribution of stomach samples by taxa and size (*n*), feeding  
 2 guild (Plank = planktivore, Benth = benthivore, B-pisc = benthopiscivore, Pisc = piscivore), log10 transformed average biomass-weighted predator-prey mass  
 3 ratios (PPMR), log10 transformed average individual prey mass (g), average predator size in cm, the % of different prey functional groups (zoop=zooplankton,  
 4 ben=benthos, nek=nekton, oth=other), axes scores from non-metric multidimensional scaling analysis (Fig. S4) and the hierarchy of feeding guilds from cluster  
 5 analysis (h2 = first split in the classification tree; h3 = third split; h5 = fifth split).  
 6

| Taxa                          | S. bin | <i>n</i> | Guild | PPMR | Prey mass | Pred cm | fish | zoop | ben | nek | oth | Axis 1 | Axis 2 | h2 | h3 | h5 |
|-------------------------------|--------|----------|-------|------|-----------|---------|------|------|-----|-----|-----|--------|--------|----|----|----|
| <i>Alosa aestivalis</i>       | 13     | 37       | Plank | 4.09 | -1.554    | 19      | 0    | 78   | 22  | 0   | 0   | 0.573  | -0.282 | 2  | 2  | 2  |
| <i>Ammodytes</i>              | 11     | 144      | Plank | 5.03 | -2.899    | 13      | 2    | 83   | 7   | 0   | 8   | 0.877  | -0.4   | 2  | 2  | 2  |
| <i>Ammodytes</i>              | 12     | 104      | Plank | 5.22 | -2.454    | 17      | 17   | 70   | 10  | 0   | 2   | 0.774  | -0.103 | 2  | 2  | 2  |
| <i>Argentina silus</i>        | 13     | 145      | Plank | 4.08 | -0.674    | 30      | 2    | 60   | 0   | 0   | 38  | 0.592  | -0.101 | 2  | 2  | 2  |
| <i>Argentina silus</i>        | 14     | 141      | Plank | 4.4  | -0.208    | 48      | 10   | 61   | 2   | 1   | 26  | 0.523  | 0.024  | 2  | 2  | 2  |
| <i>Boreogadus saida</i>       | 11     | 513      | Plank | 3.88 | -2.589    | 10      | 0    | 95   | 0   | 0   | 5   | 0.938  | -0.313 | 2  | 2  | 2  |
| <i>Boreogadus saida</i>       | 12     | 1658     | Plank | 4.13 | -2.302    | 14      | 0    | 95   | 0   | 0   | 5   | 0.891  | -0.302 | 2  | 2  | 2  |
| <i>Boreogadus saida</i>       | 13     | 31       | Plank | 4.16 | -1.967    | 23      | 0    | 95   | 0   | 0   | 5   | 0.846  | -0.277 | 2  | 2  | 2  |
| <i>Clupea harengus</i>        | 10     | 32       | Plank | 3.69 | -1.936    | 5       | 0    | 98   | 0   | 0   | 2   | 0.864  | -0.254 | 2  | 2  | 2  |
| <i>Clupea harengus</i>        | 11     | 236      | Plank | 4.43 | -1.449    | 11      | 0    | 67   | 8   | 0   | 25  | 0.633  | -0.249 | 2  | 2  | 2  |
| <i>Clupea harengus</i>        | 12     | 359      | Plank | 5.1  | -0.892    | 16      | 4    | 79   | 16  | 0   | 1   | 0.561  | -0.198 | 2  | 2  | 2  |
| <i>Clupea harengus</i>        | 13     | 1606     | Plank | 5.08 | -0.801    | 29      | 5    | 72   | 22  | 0   | 1   | 0.491  | -0.184 | 2  | 2  | 2  |
| <i>Clupea harengus</i>        | 14     | 202      | Plank | 5.44 | -0.953    | 36      | 3    | 96   | 0   | 0   | 2   | 0.762  | -0.182 | 2  | 2  | 2  |
| <i>Engraulis encrasicolus</i> | 12     | 72       | Plank | 2.78 | -0.899    | 18      | 0    | 99   | 0   | 0   | 1   | 0.819  | -0.089 | 2  | 2  | 2  |
| <i>Etmopterus spinax</i>      | 12     | 184      | Plank | 3.99 | -0.352    | 20      | 9    | 86   | 4   | 1   | 0   | 0.594  | -0.028 | 2  | 2  | 2  |
| <i>Etmopterus spinax</i>      | 13     | 241      | Plank | 4.58 | 0.165     | 31      | 22   | 64   | 12  | 2   | 0   | 0.419  | 0.104  | 2  | 2  | 2  |
| <i>Gadus morhua</i>           | 8      | 30       | Plank | 2.11 | -3.596    | 1       | 0    | 100  | 0   | 0   | 0   | 1.366  | -0.274 | 2  | 2  | 2  |
| <i>Gadus morhua</i>           | 9      | 149      | Plank | 2.72 | -3.038    | 3       | 0    | 99   | 1   | 0   | 0   | 1.131  | -0.275 | 2  | 2  | 2  |
| <i>Gadus morhua</i>           | 10     | 625      | Plank | 3.06 | -2.243    | 4       | 0    | 96   | 3   | 0   | 0   | 0.922  | -0.24  | 2  | 2  | 2  |
| <i>Gadus morhua</i>           | 11     | 2395     | Plank | 3.41 | -1.997    | 9       | 0    | 80   | 14  | 3   | 3   | 0.687  | -0.271 | 2  | 2  | 2  |
| <i>Galeus atlanticus</i>      | 13     | 134      | Plank | 4.94 | -1.217    | 34      | 2    | 62   | 5   | 31  | 0   | 0.625  | -0.381 | 2  | 2  | 2  |
| <i>Galeus melastomus</i>      | 12     | 1082     | Plank | 4.1  | -0.335    | 22      | 10   | 69   | 18  | 3   | 0   | 0.429  | -0.04  | 2  | 2  | 2  |

|                                   |    |       |       |      |        |    |    |     |    |    |    |       |        |   |   |   |
|-----------------------------------|----|-------|-------|------|--------|----|----|-----|----|----|----|-------|--------|---|---|---|
| <i>Galeus melastomus</i>          | 13 | 1847  | Plank | 3.91 | 0.133  | 39 | 19 | 58  | 20 | 3  | 0  | 0.329 | 0.073  | 2 | 2 | 2 |
| <i>Hoplostethus mediterraneus</i> | 12 | 35    | Plank | 4.42 | -0.493 | 13 | 3  | 89  | 6  | 3  | 0  | 0.616 | -0.1   | 2 | 2 | 2 |
| <i>Hoplostethus mediterraneus</i> | 13 | 48    | Plank | 2.8  | -0.186 | 23 | 9  | 58  | 16 | 17 | 0  | 0.447 | 0.08   | 2 | 2 | 2 |
| <i>Lepidopus caudatus</i>         | 13 | 96    | Plank | 4.82 | -0.478 | 57 | 12 | 82  | 1  | 5  | 0  | 0.614 | -0.015 | 2 | 2 | 2 |
| <i>Mallotus villosus</i>          | 11 | 815   | Plank | 4.07 | -2.72  | 11 | 0  | 92  | 0  | 0  | 8  | 0.949 | -0.332 | 2 | 2 | 2 |
| <i>Mallotus villosus</i>          | 12 | 2189  | Plank | 4.08 | -2.311 | 15 | 0  | 95  | 0  | 0  | 5  | 0.897 | -0.301 | 2 | 2 | 2 |
| <i>Melanogrammus aeglefinus</i>   | 9  | 31    | Plank | 2.85 | -2.975 | 3  | 0  | 100 | 0  | 0  | 0  | 1.107 | -0.28  | 2 | 2 | 2 |
| <i>Melanogrammus aeglefinus</i>   | 10 | 138   | Plank | 3.06 | -2.33  | 4  | 0  | 99  | 0  | 0  | 1  | 0.969 | -0.25  | 2 | 2 | 2 |
| <i>Merlangius merlangus</i>       | 9  | 259   | Plank | 3.03 | -3.187 | 3  | 0  | 100 | 0  | 0  | 0  | 1.118 | -0.301 | 2 | 2 | 2 |
| <i>Merlangius merlangus</i>       | 10 | 738   | Plank | 3.2  | -2.303 | 4  | 0  | 98  | 1  | 0  | 1  | 0.936 | -0.252 | 2 | 2 | 2 |
| <i>Merlangius merlangus</i>       | 11 | 1409  | Plank | 3.42 | -1.51  | 8  | 2  | 66  | 22 | 6  | 5  | 0.497 | -0.234 | 2 | 2 | 2 |
| <i>Merluccius merluccius</i>      | 11 | 498   | Plank | 3.68 | -0.565 | 10 | 9  | 55  | 10 | 27 | 0  | 0.497 | -0.005 | 2 | 2 | 2 |
| <i>Micromesistius poutassou</i>   | 12 | 3054  | Plank | 3.62 | -0.549 | 17 | 10 | 83  | 4  | 3  | 0  | 0.586 | -0.025 | 2 | 2 | 2 |
| <i>Micromesistius poutassou</i>   | 13 | 4373  | Plank | 3.52 | -0.028 | 24 | 22 | 65  | 10 | 3  | 0  | 0.424 | 0.124  | 2 | 2 | 2 |
| <i>Peprilus triacanthus</i>       | 13 | 189   | Plank | 4.5  | -1.769 | 12 | 0  | 93  | 5  | 2  | 0  | 0.768 | -0.265 | 2 | 2 | 2 |
| <i>Peprilus triacanthus</i>       | 12 | 70    | Plank | 4.15 | -0.941 | 13 | 0  | 93  | 6  | 1  | 0  | 0.677 | -0.169 | 2 | 2 | 2 |
| <i>Pollachius virens</i>          | 10 | 61    | Plank | 2.9  | -2.115 | 4  | 0  | 100 | 0  | 0  | 0  | 0.96  | -0.223 | 2 | 2 | 2 |
| <i>Sardina pilchardus</i>         | 13 | 109   | Plank | 5.94 | -1.683 | 24 | 0  | 76  | 1  | 0  | 23 | 0.782 | -0.341 | 2 | 2 | 2 |
| <i>Scomber scombrus</i>           | 12 | 488   | Plank | 3.33 | -0.534 | 18 | 12 | 79  | 6  | 2  | 0  | 0.565 | 0.008  | 2 | 2 | 2 |
| <i>Scomber scombrus</i>           | 13 | 11527 | Plank | 5.64 | -0.075 | 30 | 17 | 73  | 7  | 2  | 0  | 0.549 | 0.073  | 2 | 2 | 2 |
| <i>Scomber scombrus</i>           | 14 | 5692  | Plank | 5.77 | -0.238 | 39 | 17 | 79  | 3  | 1  | 0  | 0.622 | 0.061  | 2 | 2 | 2 |
| <i>Sebastes norvegicus</i>        | 11 | 226   | Plank | 3.21 | -1.829 | 8  | 0  | 92  | 0  | 0  | 8  | 0.865 | -0.217 | 2 | 2 | 2 |
| <i>Sebastes norvegicus</i>        | 12 | 842   | Plank | 3.94 | -1.419 | 15 | 1  | 85  | 1  | 0  | 14 | 0.746 | -0.212 | 2 | 2 | 2 |
| <i>Sebastes norvegicus</i>        | 13 | 861   | Plank | 4.24 | -0.389 | 25 | 12 | 69  | 2  | 0  | 18 | 0.564 | 0.001  | 2 | 2 | 2 |
| <i>Sebastes norvegicus</i>        | 14 | 901   | Plank | 4.22 | 0.145  | 38 | 25 | 57  | 2  | 0  | 16 | 0.451 | 0.182  | 2 | 2 | 2 |
| <i>Sprattus sprattus</i>          | 11 | 636   | Plank | 4.85 | -1.398 | 9  | 0  | 90  | 1  | 0  | 8  | 0.764 | -0.248 | 2 | 2 | 2 |
| <i>Sprattus sprattus</i>          | 12 | 322   | Plank | 5.16 | -1.33  | 12 | 3  | 88  | 4  | 0  | 6  | 0.73  | -0.228 | 2 | 2 | 2 |
| <i>Trachurus trachurus</i>        | 12 | 270   | Plank | 4.16 | -1.01  | 16 | 1  | 54  | 22 | 2  | 21 | 0.413 | -0.193 | 2 | 2 | 2 |
| <i>Trachurus trachurus</i>        | 13 | 2528  | Plank | 4.72 | -0.595 | 27 | 10 | 53  | 18 | 4  | 16 | 0.394 | -0.072 | 2 | 2 | 2 |

|                                 |    |      |       |      |        |    |    |    |    |    |    |        |        |   |   |   |
|---------------------------------|----|------|-------|------|--------|----|----|----|----|----|----|--------|--------|---|---|---|
| <i>Trisopterus esmarkii</i>     | 10 | 46   | Plank | 3.45 | -2.364 | 5  | 0  | 98 | 0  | 0  | 2  | 0.936  | -0.274 | 2 | 2 | 2 |
| <i>Trisopterus esmarkii</i>     | 11 | 751  | Plank | 2.91 | -1.424 | 10 | 0  | 76 | 13 | 10 | 1  | 0.646  | -0.202 | 2 | 2 | 2 |
| <i>Trisopterus esmarkii</i>     | 12 | 649  | Plank | 3.46 | -1.064 | 15 | 2  | 68 | 13 | 14 | 3  | 0.545  | -0.155 | 2 | 2 | 2 |
| <i>Trisopterus esmarkii</i>     | 13 | 106  | Plank | 3.16 | -0.824 | 21 | 4  | 67 | 12 | 17 | 0  | 0.535  | -0.09  | 2 | 2 | 2 |
| <i>Zeus faber</i>               | 11 | 40   | Plank | 3.03 | -0.531 | 7  | 13 | 66 | 18 | 3  | 0  | 0.433  | 0.004  | 2 | 2 | 2 |
| <i>Agonus cataphractus</i>      | 11 | 99   | Benth | 3.24 | -1.954 | 9  | 0  | 0  | 75 | 0  | 25 | -0.387 | -0.424 | 1 | 1 | 1 |
| <i>Amblyraja radiata</i>        | 12 | 76   | Benth | 3.63 | -0.735 | 19 | 4  | 11 | 66 | 13 | 7  | -0.127 | -0.209 | 1 | 1 | 3 |
| <i>Anarhichas lupus</i>         | 12 | 456  | Benth | 3.07 | -1.116 | 15 | 1  | 1  | 84 | 0  | 14 | -0.378 | -0.294 | 1 | 1 | 1 |
| <i>Anarhichas lupus</i>         | 13 | 1328 | Benth | 3.69 | -0.689 | 30 | 2  | 0  | 78 | 0  | 20 | -0.288 | -0.248 | 1 | 1 | 1 |
| <i>Anarhichas lupus</i>         | 14 | 1137 | Benth | 4.11 | 0.081  | 50 | 5  | 0  | 85 | 0  | 10 | -0.305 | -0.152 | 1 | 1 | 1 |
| <i>Anarhichas lupus</i>         | 15 | 495  | Benth | 4.24 | 0.343  | 70 | 14 | 0  | 75 | 0  | 11 | -0.264 | -0.058 | 1 | 1 | 1 |
| <i>Anarhichas minor</i>         | 13 | 37   | Benth | 3.26 | -0.461 | 24 | 0  | 0  | 80 | 0  | 20 | -0.341 | -0.212 | 1 | 1 | 1 |
| <i>Anarhichas minor</i>         | 14 | 256  | Benth | 3.68 | -0.027 | 47 | 5  | 2  | 74 | 0  | 19 | -0.263 | -0.129 | 1 | 1 | 1 |
| <i>Arnoglossus imperialis</i>   | 12 | 38   | Benth | 4.42 | -0.775 | 13 | 3  | 5  | 61 | 30 | 0  | -0.093 | -0.403 | 1 | 1 | 3 |
| <i>Arnoglossus laterna</i>      | 11 | 165  | Benth | 4.66 | -2.046 | 10 | 0  | 2  | 93 | 4  | 1  | -0.331 | -0.491 | 1 | 1 | 1 |
| <i>Arnoglossus laterna</i>      | 12 | 150  | Benth | 4.93 | -1.971 | 13 | 0  | 10 | 78 | 11 | 0  | -0.182 | -0.495 | 1 | 1 | 1 |
| <i>Callionymus lyra</i>         | 12 | 742  | Benth | 2.93 | -0.905 | 17 | 0  | 7  | 90 | 1  | 1  | -0.346 | -0.277 | 1 | 1 | 1 |
| <i>Callionymus lyra</i>         | 13 | 1338 | Benth | 2.99 | -0.659 | 23 | 0  | 7  | 92 | 0  | 0  | -0.349 | -0.249 | 1 | 1 | 1 |
| <i>Centropristis striata</i>    | 12 | 61   | Benth | 2.35 | 0.075  | 26 | 9  | 2  | 87 | 2  | 0  | -0.425 | -0.07  | 1 | 1 | 1 |
| <i>Centropristis striata</i>    | 13 | 453  | Benth | 3.17 | 0.225  | 27 | 8  | 2  | 87 | 4  | 0  | -0.328 | -0.088 | 1 | 1 | 1 |
| <i>Chelidonichthys cuculus</i>  | 11 | 74   | Benth | 2.36 | -0.922 | 10 | 1  | 23 | 51 | 24 | 0  | 0.075  | -0.421 | 1 | 1 | 3 |
| <i>Chelidonichthys cuculus</i>  | 12 | 939  | Benth | 2.69 | -0.878 | 13 | 1  | 14 | 57 | 27 | 0  | -0.027 | -0.405 | 1 | 1 | 3 |
| <i>Chelidonichthys cuculus</i>  | 13 | 3987 | Benth | 3.02 | -0.379 | 23 | 10 | 19 | 54 | 16 | 0  | -0.023 | -0.087 | 1 | 1 | 3 |
| <i>Chelidonichthys lucerna</i>  | 13 | 915  | Benth | 3.57 | 0.252  | 27 | 16 | 11 | 70 | 2  | 0  | -0.183 | -0.027 | 1 | 1 | 1 |
| <i>Chelidonichthys obscurus</i> | 12 | 94   | Benth | 5    | -1.235 | 16 | 0  | 2  | 94 | 4  | 0  | -0.296 | -0.411 | 1 | 1 | 1 |
| <i>Chelidonichthys obscurus</i> | 13 | 512  | Benth | 4.68 | -0.794 | 24 | 0  | 9  | 64 | 26 | 0  | -0.087 | -0.393 | 1 | 1 | 3 |
| <i>Chimaera monstrosa</i>       | 14 | 60   | Benth | 5.5  | -1.279 | 26 | 0  | 6  | 94 | 0  | 0  | -0.29  | -0.452 | 1 | 1 | 1 |
| <i>Chimaera monstrosa</i>       | 15 | 51   | Benth | 6.47 | -0.488 | 45 | 0  | 2  | 96 | 2  | 0  | -0.383 | -0.386 | 1 | 1 | 1 |
| <i>Ciliata mustela</i>          | 12 | 63   | Benth | 3.33 | -0.672 | 17 | 9  | 0  | 87 | 0  | 3  | -0.342 | -0.19  | 1 | 1 | 1 |

|                                     |    |       |       |      |        |    |    |    |     |    |    |        |        |   |   |   |
|-------------------------------------|----|-------|-------|------|--------|----|----|----|-----|----|----|--------|--------|---|---|---|
| <i>Citharichthys arctifrons</i>     | 13 | 43    | Benth | 4.01 | -1.494 | 11 | 0  | 26 | 74  | 0  | 0  | -0.072 | -0.366 | 1 | 1 | 1 |
| <i>Citharus linguatula</i>          | 12 | 156   | Benth | 5.18 | -2.234 | 16 | 0  | 21 | 75  | 4  | 0  | -0.084 | -0.527 | 1 | 1 | 1 |
| <i>Coris julis</i>                  | 12 | 228   | Benth | 2.58 | -0.677 | 15 | 2  | 19 | 50  | 29 | 0  | 0.067  | -0.363 | 1 | 1 | 3 |
| <i>Dicentrarchus labrax</i>         | 12 | 39    | Benth | 2.98 | -0.991 | 15 | 0  | 0  | 100 | 0  | 0  | -0.438 | -0.31  | 1 | 1 | 1 |
| <i>Dicentrarchus labrax</i>         | 13 | 144   | Benth | 3    | -0.464 | 22 | 4  | 0  | 79  | 0  | 17 | -0.353 | -0.179 | 1 | 1 | 1 |
| <i>Dipturus laevis</i>              | 12 | 80    | Benth | 1.83 | 0.084  | 57 | 5  | 0  | 95  | 0  | 0  | -0.558 | -0.117 | 1 | 1 | 1 |
| <i>Dipturus laevis</i>              | 13 | 1020  | Benth | 2.52 | 0.486  | 64 | 11 | 1  | 88  | 1  | 0  | -0.419 | -0.032 | 1 | 1 | 1 |
| <i>Dipturus laevis</i>              | 15 | 96    | Benth | 3.58 | 1.228  | 65 | 18 | 1  | 81  | 0  | 0  | -0.328 | 0.024  | 1 | 1 | 1 |
| <i>Dipturus laevis</i>              | 14 | 906   | Benth | 3.24 | 1      | 67 | 15 | 0  | 84  | 1  | 0  | -0.35  | 0.005  | 1 | 1 | 1 |
| <i>Enchelyopus cimbrius</i>         | 12 | 65    | Benth | 3.61 | -1.199 | 20 | 2  | 15 | 72  | 0  | 12 | -0.15  | -0.294 | 1 | 1 | 1 |
| <i>Enchelyopus cimbrius</i>         | 13 | 86    | Benth | 3.8  | -0.96  | 27 | 0  | 13 | 77  | 0  | 9  | -0.186 | -0.29  | 1 | 1 | 1 |
| <i>Eutrigla gurnardus</i>           | 11 | 31    | Benth | 2.64 | -1.207 | 9  | 0  | 0  | 74  | 26 | 0  | -0.523 | -0.344 | 1 | 1 | 3 |
| <i>Eutrigla gurnardus</i>           | 12 | 6076  | Benth | 3    | -0.809 | 16 | 5  | 15 | 61  | 17 | 3  | -0.072 | -0.222 | 1 | 1 | 3 |
| <i>Gadus morhua</i>                 | 13 | 47491 | Benth | 3.2  | 0.201  | 29 | 18 | 8  | 71  | 1  | 2  | -0.225 | -0.009 | 1 | 1 | 1 |
| <i>Gaidropsarus macrophthalmus</i>  | 11 | 205   | Benth | 1.87 | -0.623 | 10 | 2  | 13 | 76  | 9  | 0  | -0.461 | -0.182 | 1 | 1 | 1 |
| <i>Gaidropsarus macrophthalmus</i>  | 12 | 587   | Benth | 2.24 | -0.402 | 14 | 6  | 12 | 76  | 6  | 0  | -0.347 | -0.125 | 1 | 1 | 1 |
| <i>Glyptocephalus cynoglossus</i>   | 13 | 68    | Benth | 3.55 | -0.477 | 32 | 0  | 4  | 90  | 6  | 0  | -0.303 | -0.229 | 1 | 1 | 1 |
| <i>Hippoglossoides platessoides</i> | 11 | 81    | Benth | 2.92 | -1.723 | 8  | 0  | 5  | 18  | 0  | 77 | 0.219  | -0.586 | 1 | 1 | 1 |
| <i>Hippoglossoides platessoides</i> | 12 | 1972  | Benth | 3.12 | -1.139 | 15 | 1  | 15 | 34  | 0  | 50 | 0.112  | -0.265 | 1 | 1 | 1 |
| <i>Lepidorhombus boscii</i>         | 11 | 151   | Benth | 2.23 | -0.999 | 11 | 1  | 10 | 83  | 6  | 0  | -0.424 | -0.271 | 1 | 1 | 1 |
| <i>Lepidorhombus boscii</i>         | 12 | 13164 | Benth | 2.6  | -0.64  | 16 | 3  | 15 | 74  | 8  | 0  | -0.196 | -0.216 | 1 | 1 | 1 |
| <i>Lepidorhombus boscii</i>         | 13 | 14638 | Benth | 2.65 | -0.126 | 24 | 12 | 11 | 74  | 2  | 0  | -0.251 | -0.06  | 1 | 1 | 1 |
| <i>Lepidorhombus boscii</i>         | 14 | 51    | Benth | 2.99 | 0.185  | 37 | 23 | 3  | 74  | 0  | 0  | -0.287 | 0.021  | 1 | 1 | 1 |
| <i>Lepidotrigla cavillone</i>       | 11 | 49    | Benth | 4.65 | -3.35  | 9  | 0  | 0  | 61  | 39 | 0  | -0.254 | -0.89  | 1 | 1 | 3 |
| <i>Lepidotrigla cavillone</i>       | 12 | 56    | Benth | 4.96 | -3.022 | 11 | 0  | 0  | 49  | 51 | 0  | -0.088 | -0.96  | 1 | 1 | 3 |
| <i>Lepidotrigla dieuzeidei</i>      | 12 | 65    | Benth | 5.14 | -3.045 | 12 | 0  | 0  | 53  | 47 | 0  | -0.128 | -0.938 | 1 | 1 | 3 |
| <i>Lepophidium profundorum</i>      | 13 | 46    | Benth | 4.08 | -1.182 | 23 | 2  | 32 | 66  | 0  | 0  | 0.006  | -0.301 | 1 | 1 | 1 |
| <i>Lepophidium profundorum</i>      | 14 | 41    | Benth | 4.7  | -1.362 | 23 | 0  | 24 | 76  | 0  | 0  | -0.071 | -0.384 | 1 | 1 | 1 |
| <i>Leucoraja erinacea</i>           | 12 | 301   | Benth | 2.7  | -0.299 | 40 | 7  | 3  | 88  | 2  | 0  | -0.375 | -0.14  | 1 | 1 | 1 |



|                                 |    |       |       |      |        |    |    |    |    |    |    |        |        |   |   |   |
|---------------------------------|----|-------|-------|------|--------|----|----|----|----|----|----|--------|--------|---|---|---|
| <i>Leucoraja erinacea</i>       | 13 | 5733  | Benth | 3.16 | -0.108 | 40 | 7  | 3  | 89 | 1  | 0  | -0.332 | -0.133 | 1 | 1 | 1 |
| <i>Leucoraja erinacea</i>       | 14 | 5402  | Benth | 3.79 | -0.027 | 41 | 8  | 2  | 89 | 1  | 0  | -0.3   | -0.14  | 1 | 1 | 1 |
| <i>Leucoraja garmani</i>        | 13 | 190   | Benth | 3.21 | -0.412 | 37 | 5  | 8  | 86 | 2  | 0  | -0.277 | -0.176 | 1 | 1 | 1 |
| <i>Leucoraja garmani</i>        | 14 | 173   | Benth | 3.93 | -0.435 | 37 | 4  | 2  | 93 | 1  | 0  | -0.309 | -0.227 | 1 | 1 | 1 |
| <i>Leucoraja naevus</i>         | 13 | 231   | Benth | 4.37 | -0.308 | 33 | 3  | 10 | 68 | 18 | 0  | -0.11  | -0.22  | 1 | 1 | 3 |
| <i>Limanda ferruginea</i>       | 13 | 268   | Benth | 4.01 | -0.583 | 30 | 6  | 6  | 88 | 0  | 0  | -0.263 | -0.228 | 1 | 1 | 1 |
| <i>Limanda ferruginea</i>       | 14 | 192   | Benth | 4.43 | -0.717 | 30 | 2  | 10 | 88 | 0  | 0  | -0.222 | -0.29  | 1 | 1 | 1 |
| <i>Limanda limanda</i>          | 11 | 67    | Benth | 3.47 | -2.229 | 8  | 0  | 5  | 71 | 0  | 23 | -0.293 | -0.472 | 1 | 1 | 1 |
| <i>Limanda limanda</i>          | 12 | 1134  | Benth | 3.17 | -1.282 | 16 | 0  | 1  | 96 | 0  | 2  | -0.407 | -0.338 | 1 | 1 | 1 |
| <i>Limanda limanda</i>          | 13 | 4080  | Benth | 3.44 | -0.819 | 22 | 4  | 4  | 90 | 0  | 1  | -0.312 | -0.249 | 1 | 1 | 1 |
| <i>Lipophrys pholis</i>         | 10 | 35    | Benth | 2.47 | -2.471 | 4  | 0  | 7  | 45 | 0  | 48 | -0.098 | -0.718 | 1 | 1 | 1 |
| <i>Lumpenus lampraeformis</i>   | 12 | 87    | Benth | 4.31 | -1.701 | 30 | 0  | 5  | 51 | 0  | 44 | -0.075 | -0.452 | 1 | 1 | 1 |
| <i>Macrozoarces americanus</i>  | 13 | 355   | Benth | 3.13 | 0.177  | 50 | 0  | 0  | 99 | 0  | 0  | -0.421 | -0.156 | 1 | 1 | 1 |
| <i>Macrozoarces americanus</i>  | 14 | 314   | Benth | 3.81 | 0.133  | 51 | 1  | 0  | 99 | 0  | 0  | -0.378 | -0.185 | 1 | 1 | 1 |
| <i>Malacocephalus laevis</i>    | 12 | 32    | Benth | 3.75 | -1.432 | 5  | 0  | 5  | 91 | 3  | 0  | -0.3   | -0.356 | 1 | 1 | 1 |
| <i>Malacoraja senta</i>         | 13 | 453   | Benth | 2.93 | 0.105  | 45 | 9  | 5  | 86 | 0  | 0  | -0.339 | -0.093 | 1 | 1 | 1 |
| <i>Malacoraja senta</i>         | 14 | 452   | Benth | 3.52 | 0.143  | 46 | 12 | 4  | 84 | 0  | 0  | -0.285 | -0.084 | 1 | 1 | 1 |
| <i>Melanogrammus aeglefinus</i> | 11 | 368   | Benth | 3.54 | -1.76  | 9  | 0  | 34 | 62 | 2  | 2  | 0.049  | -0.373 | 1 | 1 | 1 |
| <i>Melanogrammus aeglefinus</i> | 12 | 10564 | Benth | 3.56 | -0.992 | 15 | 5  | 17 | 65 | 5  | 9  | -0.094 | -0.22  | 1 | 1 | 3 |
| <i>Microchirus variegatus</i>   | 12 | 45    | Benth | 4.23 | -0.746 | 12 | 0  | 6  | 94 | 0  | 0  | -0.278 | -0.31  | 1 | 1 | 1 |
| <i>Microstomus kitt</i>         | 12 | 94    | Benth | 3.94 | -1.928 | 16 | 0  | 0  | 91 | 0  | 9  | -0.376 | -0.45  | 1 | 1 | 1 |
| <i>Microstomus kitt</i>         | 13 | 580   | Benth | 4.64 | -1.397 | 25 | 0  | 2  | 88 | 1  | 9  | -0.3   | -0.406 | 1 | 1 | 1 |
| <i>Microstomus kitt</i>         | 14 | 587   | Benth | 4.83 | -1.277 | 37 | 0  | 0  | 87 | 0  | 13 | -0.306 | -0.411 | 1 | 1 | 1 |
| <i>Mullus surmuletus</i>        | 12 | 163   | Benth | 4.98 | -1.4   | 14 | 0  | 4  | 86 | 7  | 3  | -0.257 | -0.421 | 1 | 1 | 1 |
| <i>Mullus surmuletus</i>        | 13 | 888   | Benth | 4.56 | -0.668 | 23 | 0  | 7  | 84 | 8  | 1  | -0.222 | -0.296 | 1 | 1 | 1 |
| <i>Mullus surmuletus</i>        | 14 | 66    | Benth | 3.33 | -0.365 | 31 | 0  | 7  | 89 | 2  | 2  | -0.296 | -0.206 | 1 | 1 | 1 |
| <i>Mustelus canis</i>           | 12 | 112   | Benth | 1.82 | 0.357  | 80 | 10 | 2  | 82 | 6  | 0  | -0.483 | -0.005 | 1 | 1 | 1 |
| <i>Mustelus canis</i>           | 13 | 1758  | Benth | 2.04 | 0.814  | 89 | 11 | 1  | 82 | 7  | 0  | -0.471 | 0.034  | 1 | 1 | 1 |
| <i>Mustelus canis</i>           | 14 | 1782  | Benth | 3.83 | 1.142  | 90 | 10 | 1  | 82 | 7  | 0  | -0.322 | -0.025 | 1 | 1 | 1 |

|                                        |    |      |       |      |        |    |    |    |     |    |    |        |        |   |   |   |
|----------------------------------------|----|------|-------|------|--------|----|----|----|-----|----|----|--------|--------|---|---|---|
| <i>Myoxocephalus octodecemspinosus</i> | 12 | 95   | Benth | 2.29 | 0.044  | 26 | 8  | 0  | 92  | 0  | 0  | -0.473 | -0.097 | 1 | 1 | 1 |
| <i>Myoxocephalus octodecemspinosus</i> | 13 | 2555 | Benth | 3.01 | 0.141  | 26 | 8  | 1  | 91  | 0  | 0  | -0.373 | -0.102 | 1 | 1 | 1 |
| <i>Myoxocephalus octodecemspinosus</i> | 14 | 545  | Benth | 3.23 | 0.121  | 26 | 6  | 1  | 93  | 0  | 0  | -0.368 | -0.124 | 1 | 1 | 1 |
| <i>Nezumia aequalis</i>                | 12 | 74   | Benth | 4.94 | -1.734 | 6  | 0  | 3  | 73  | 24 | 0  | -0.204 | -0.547 | 1 | 1 | 1 |
| <i>Pagellus acarne</i>                 | 13 | 782  | Benth | 4.48 | -0.018 | 26 | 7  | 18 | 61  | 14 | 0  | -0.041 | -0.127 | 1 | 1 | 3 |
| <i>Pagellus acarne</i>                 | 14 | 615  | Benth | 3.44 | 0.187  | 32 | 9  | 9  | 70  | 12 | 0  | -0.197 | -0.062 | 1 | 1 | 3 |
| <i>Pagellus erythrinus</i>             | 14 | 121  | Benth | 2.98 | 0.398  | 36 | 10 | 6  | 78  | 5  | 0  | -0.283 | -0.037 | 1 | 1 | 1 |
| <i>Paralichthys oblongus</i>           | 13 | 2252 | Benth | 3.07 | 0.21   | 28 | 14 | 2  | 73  | 11 | 0  | -0.285 | -0.009 | 1 | 1 | 3 |
| <i>Paralichthys oblongus</i>           | 14 | 1932 | Benth | 3.62 | 0.327  | 28 | 17 | 2  | 70  | 12 | 0  | -0.241 | 0.004  | 1 | 1 | 3 |
| <i>Paralichthys oblongus</i>           | 12 | 116  | Benth | 2.49 | 0.107  | 29 | 9  | 4  | 69  | 17 | 0  | -0.392 | 0.017  | 1 | 1 | 3 |
| <i>Paralichthys oblongus</i>           | 15 | 36   | Benth | 4.15 | 0.662  | 30 | 19 | 6  | 63  | 11 | 0  | -0.177 | 0.045  | 1 | 1 | 3 |
| <i>Phycis blennoides</i>               | 12 | 1200 | Benth | 2.81 | -0.552 | 17 | 2  | 10 | 83  | 5  | 0  | -0.291 | -0.204 | 1 | 1 | 1 |
| <i>Phycis blennoides</i>               | 13 | 570  | Benth | 3.56 | -0.181 | 25 | 5  | 9  | 83  | 4  | 0  | -0.233 | -0.153 | 1 | 1 | 1 |
| <i>Phycis blennoides</i>               | 14 | 92   | Benth | 3.03 | 0.538  | 41 | 17 | 8  | 73  | 2  | 0  | -0.25  | 0.015  | 1 | 1 | 1 |
| <i>Platichthys flesus</i>              | 10 | 524  | Benth | 2.41 | -2.107 | 4  | 0  | 0  | 100 | 0  | 0  | -0.58  | -0.468 | 1 | 1 | 1 |
| <i>Platichthys flesus</i>              | 11 | 120  | Benth | 3    | -1.275 | 7  | 0  | 0  | 98  | 0  | 2  | -0.443 | -0.345 | 1 | 1 | 1 |
| <i>Platichthys flesus</i>              | 12 | 94   | Benth | 3.51 | -0.868 | 12 | 1  | 0  | 97  | 0  | 2  | -0.37  | -0.297 | 1 | 1 | 1 |
| <i>Platichthys flesus</i>              | 13 | 1075 | Benth | 3.95 | -0.38  | 21 | 4  | 0  | 93  | 0  | 2  | -0.332 | -0.227 | 1 | 1 | 1 |
| <i>Pleuronectes platessa</i>           | 11 | 354  | Benth | 3.3  | -1.334 | 7  | 0  | 9  | 77  | 0  | 14 | -0.248 | -0.331 | 1 | 1 | 1 |
| <i>Pleuronectes platessa</i>           | 12 | 1829 | Benth | 3.66 | -1.311 | 13 | 0  | 11 | 85  | 0  | 4  | -0.247 | -0.342 | 1 | 1 | 1 |
| <i>Pleuronectes platessa</i>           | 13 | 7220 | Benth | 3.83 | -0.82  | 25 | 6  | 5  | 88  | 0  | 1  | -0.279 | -0.251 | 1 | 1 | 1 |
| <i>Pleuronectes platessa</i>           | 14 | 2079 | Benth | 4.37 | -0.577 | 40 | 6  | 5  | 83  | 0  | 7  | -0.249 | -0.238 | 1 | 1 | 1 |
| <i>Pomatoschistus minutus</i>          | 11 | 52   | Benth | 3.6  | -1.886 | 6  | 0  | 3  | 80  | 0  | 17 | -0.34  | -0.412 | 1 | 1 | 1 |
| <i>Prionotus carolinus</i>             | 13 | 273  | Benth | 3.78 | -0.757 | 21 | 1  | 6  | 93  | 0  | 0  | -0.296 | -0.282 | 1 | 1 | 1 |
| <i>Prionotus carolinus</i>             | 12 | 36   | Benth | 2.84 | -0.816 | 22 | 0  | 6  | 94  | 0  | 0  | -0.39  | -0.276 | 1 | 1 | 1 |
| <i>Prionotus carolinus</i>             | 14 | 109  | Benth | 4.04 | -0.664 | 23 | 4  | 4  | 93  | 0  | 0  | -0.295 | -0.267 | 1 | 1 | 1 |

|                                      |    |      |       |      |        |    |    |    |     |    |    |        |        |   |   |   |
|--------------------------------------|----|------|-------|------|--------|----|----|----|-----|----|----|--------|--------|---|---|---|
| <i>Prionotus evolans</i>             | 13 | 184  | Benth | 2.84 | 0.138  | 28 | 21 | 2  | 76  | 1  | 0  | -0.309 | 0.015  | 1 | 1 | 1 |
| <i>Prionotus evolans</i>             | 14 | 61   | Benth | 3.35 | 0.165  | 28 | 27 | 3  | 70  | 0  | 0  | -0.255 | 0.042  | 1 | 1 | 1 |
| <i>Pseudopleuronectes americanus</i> | 12 | 37   | Benth | 3.41 | -0.924 | 27 | 0  | 0  | 100 | 0  | 0  | -0.394 | -0.312 | 1 | 1 | 1 |
| <i>Pseudopleuronectes americanus</i> | 13 | 260  | Benth | 4.01 | -0.641 | 32 | 2  | 3  | 95  | 0  | 0  | -0.308 | -0.28  | 1 | 1 | 1 |
| <i>Pseudopleuronectes americanus</i> | 14 | 299  | Benth | 5.04 | -0.329 | 33 | 1  | 2  | 97  | 0  | 0  | -0.328 | -0.311 | 1 | 1 | 1 |
| <i>Raja clavata</i>                  | 12 | 154  | Benth | 3.71 | -0.652 | 18 | 3  | 4  | 78  | 15 | 0  | -0.234 | -0.243 | 1 | 1 | 3 |
| <i>Raja clavata</i>                  | 13 | 1476 | Benth | 3.33 | -0.357 | 31 | 2  | 3  | 77  | 18 | 0  | -0.298 | -0.186 | 1 | 1 | 3 |
| <i>Raja clavata</i>                  | 14 | 3012 | Benth | 3.18 | 0.525  | 53 | 6  | 2  | 84  | 7  | 0  | -0.334 | -0.064 | 1 | 1 | 1 |
| <i>Raja clavata</i>                  | 15 | 638  | Benth | 3.26 | 0.924  | 78 | 16 | 1  | 81  | 3  | 0  | -0.321 | 0.015  | 1 | 1 | 1 |
| <i>Raja montagui</i>                 | 13 | 553  | Benth | 3.31 | -0.339 | 32 | 6  | 6  | 62  | 26 | 0  | -0.135 | -0.17  | 1 | 1 | 3 |
| <i>Raja montagui</i>                 | 14 | 1512 | Benth | 3.4  | 0.302  | 52 | 17 | 4  | 61  | 17 | 0  | -0.219 | 0.052  | 1 | 1 | 3 |
| <i>Scophthalmus aquosus</i>          | 12 | 96   | Benth | 2.55 | -0.29  | 27 | 18 | 3  | 77  | 1  | 0  | -0.353 | -0.035 | 1 | 1 | 1 |
| <i>Scophthalmus aquosus</i>          | 13 | 1612 | Benth | 3.13 | -0.208 | 27 | 18 | 4  | 78  | 0  | 0  | -0.281 | -0.061 | 1 | 1 | 1 |
| <i>Scophthalmus aquosus</i>          | 14 | 1576 | Benth | 3.83 | -0.183 | 27 | 18 | 4  | 77  | 1  | 0  | -0.235 | -0.075 | 1 | 1 | 1 |
| <i>Scorpaena notata</i>              | 12 | 56   | Benth | 4.92 | -0.868 | 12 | 0  | 7  | 88  | 4  | 2  | -0.229 | -0.342 | 1 | 1 | 1 |
| <i>Scorpaena notata</i>              | 13 | 34   | Benth | 4.44 | -0.261 | 16 | 0  | 6  | 84  | 7  | 3  | -0.234 | -0.235 | 1 | 1 | 1 |
| <i>Serranus hepatus</i>              | 12 | 134  | Benth | 4.99 | -2.759 | 11 | 0  | 4  | 84  | 11 | 0  | -0.314 | -0.609 | 1 | 1 | 1 |
| <i>Solea solea</i>                   | 12 | 221  | Benth | 3.76 | -1.758 | 15 | 1  | 1  | 79  | 0  | 19 | -0.325 | -0.395 | 1 | 1 | 1 |
| <i>Solea solea</i>                   | 13 | 450  | Benth | 3.78 | -0.956 | 26 | 3  | 2  | 92  | 0  | 3  | -0.32  | -0.295 | 1 | 1 | 1 |
| <i>Solea solea</i>                   | 14 | 39   | Benth | 4.12 | -0.548 | 37 | 9  | 9  | 82  | 0  | 0  | -0.215 | -0.195 | 1 | 1 | 1 |
| <i>Spondyliosoma cantharus</i>       | 13 | 124  | Benth | 5.02 | 0.047  | 23 | 8  | 28 | 46  | 14 | 4  | 0.107  | -0.101 | 1 | 1 | 3 |
| <i>Stenotomus chrysops</i>           | 13 | 114  | Benth | 4.22 | -0.971 | 17 | 3  | 12 | 78  | 7  | 0  | -0.161 | -0.281 | 1 | 1 | 1 |
| <i>Stenotomus chrysops</i>           | 14 | 80   | Benth | 5.36 | -0.485 | 19 | 6  | 10 | 80  | 4  | 0  | -0.173 | -0.261 | 1 | 1 | 1 |
| <i>Tautoglabrus adspersus</i>        | 13 | 33   | Benth | 3.47 | -0.627 | 30 | 2  | 0  | 98  | 0  | 0  | -0.375 | -0.262 | 1 | 1 | 1 |
| <i>Trigla lyra</i>                   | 12 | 732  | Benth | 2.55 | -0.883 | 12 | 1  | 8  | 64  | 27 | 0  | -0.169 | -0.445 | 1 | 1 | 3 |
| <i>Trigla lyra</i>                   | 13 | 568  | Benth | 3    | -0.197 | 25 | 6  | 14 | 67  | 13 | 0  | -0.152 | -0.116 | 1 | 1 | 3 |
| <i>Trigla lyra</i>                   | 14 | 31   | Benth | 2.78 | 0.49   | 47 | 3  | 0  | 95  | 0  | 2  | -0.44  | -0.098 | 1 | 1 | 1 |
| <i>Trisopterus luscus</i>            | 12 | 812  | Benth | 2.87 | -0.685 | 15 | 3  | 17 | 77  | 3  | 0  | -0.189 | -0.217 | 1 | 1 | 1 |
| <i>Trisopterus luscus</i>            | 13 | 3147 | Benth | 3.03 | -0.193 | 23 | 10 | 9  | 79  | 2  | 0  | -0.25  | -0.107 | 1 | 1 | 1 |

|                                  |    |       |        |      |        |    |    |    |    |    |    |        |        |   |   |   |
|----------------------------------|----|-------|--------|------|--------|----|----|----|----|----|----|--------|--------|---|---|---|
| <i>Trisopterus luscus</i>        | 14 | 207   | Benth  | 3.01 | 0.227  | 33 | 23 | 4  | 71 | 1  | 0  | -0.266 | 0.035  | 1 | 1 | 1 |
| <i>Trisopterus minutus</i>       | 12 | 1511  | Benth  | 2.88 | -0.828 | 15 | 2  | 17 | 76 | 4  | 0  | -0.176 | -0.241 | 1 | 1 | 1 |
| <i>Trisopterus minutus</i>       | 13 | 883   | Benth  | 2.95 | -0.561 | 20 | 4  | 16 | 78 | 2  | 0  | -0.196 | -0.19  | 1 | 1 | 1 |
| <i>Urophycis chuss</i>           | 12 | 60    | Benth  | 2.89 | -0.175 | 27 | 4  | 3  | 93 | 0  | 0  | -0.38  | -0.165 | 1 | 1 | 1 |
| <i>Urophycis chuss</i>           | 15 | 63    | Benth  | 4.31 | -0.194 | 28 | 6  | 7  | 87 | 0  | 0  | -0.246 | -0.192 | 1 | 1 | 1 |
| <i>Urophycis chuss</i>           | 13 | 2391  | Benth  | 3.31 | 0.094  | 31 | 9  | 5  | 85 | 1  | 0  | -0.296 | -0.1   | 1 | 1 | 1 |
| <i>Urophycis chuss</i>           | 14 | 2434  | Benth  | 3.82 | 0.402  | 32 | 13 | 4  | 82 | 1  | 0  | -0.271 | -0.063 | 1 | 1 | 1 |
| <i>Amblyraja radiata</i>         | 13 | 1466  | B-pisc | 3.5  | 0.611  | 39 | 24 | 8  | 60 | 7  | 1  | -0.174 | 0.083  | 1 | 1 | 4 |
| <i>Amblyraja radiata</i>         | 14 | 2031  | B-pisc | 3.41 | 0.861  | 50 | 37 | 6  | 54 | 3  | 0  | -0.179 | 0.189  | 1 | 1 | 4 |
| <i>Anarhichas minor</i>          | 15 | 312   | B-pisc | 4.42 | 1.01   | 77 | 24 | 4  | 56 | 0  | 16 | -0.184 | 0.115  | 1 | 1 | 4 |
| <i>Argentina sphyraena</i>       | 12 | 61    | B-pisc | 3.55 | -1.497 | 19 | 0  | 59 | 40 | 0  | 0  | 0.344  | -0.314 | 1 | 1 | 4 |
| <i>Brosme brosme</i>             | 14 | 94    | B-pisc | 3.2  | 0.512  | 45 | 39 | 14 | 35 | 1  | 11 | -0.053 | 0.262  | 1 | 1 | 4 |
| <i>Chelidonichthys cuculus</i>   | 14 | 67    | B-pisc | 3.3  | 0.409  | 36 | 31 | 11 | 55 | 3  | 0  | -0.145 | 0.121  | 1 | 1 | 4 |
| <i>Chelidonichthys lucerna</i>   | 14 | 299   | B-pisc | 2.66 | 0.873  | 39 | 30 | 4  | 65 | 1  | 0  | -0.297 | 0.16   | 1 | 1 | 4 |
| <i>Conger conger</i>             | 12 | 642   | B-pisc | 3.37 | -0.169 | 31 | 17 | 23 | 57 | 3  | 0  | -0.048 | -0.021 | 1 | 1 | 4 |
| <i>Conger conger</i>             | 13 | 7544  | B-pisc | 3.1  | 0.367  | 46 | 40 | 14 | 44 | 2  | 0  | -0.089 | 0.221  | 1 | 1 | 4 |
| <i>Conger conger</i>             | 14 | 300   | B-pisc | 2.92 | 1.068  | 71 | 57 | 4  | 36 | 3  | 0  | -0.146 | 0.404  | 1 | 1 | 4 |
| <i>Coris julis</i>               | 13 | 438   | B-pisc | 2.88 | 0.232  | 34 | 19 | 51 | 27 | 2  | 0  | 0.262  | 0.127  | 1 | 1 | 4 |
| <i>Dicentrarchus labrax</i>      | 14 | 48    | B-pisc | 2.6  | 0.724  | 42 | 47 | 0  | 39 | 0  | 13 | -0.226 | 0.384  | 1 | 1 | 4 |
| <i>Echiichthys vipera</i>        | 12 | 383   | B-pisc | 2.34 | -0.148 | 13 | 17 | 65 | 13 | 5  | 0  | 0.488  | 0.172  | 1 | 1 | 4 |
| <i>Eutrigla gurnardus</i>        | 13 | 10342 | B-pisc | 3.21 | -0.09  | 25 | 31 | 17 | 35 | 10 | 7  | 0.01   | 0.169  | 1 | 1 | 4 |
| <i>Gadus morhua</i>              | 12 | 10404 | B-pisc | 3.14 | -0.861 | 16 | 4  | 28 | 62 | 4  | 3  | -0.017 | -0.211 | 1 | 1 | 4 |
| <i>Gadus morhua</i>              | 14 | 88240 | B-pisc | 3.62 | 0.638  | 47 | 39 | 8  | 51 | 0  | 2  | -0.147 | 0.19   | 1 | 1 | 4 |
| <i>Galeus melastomus</i>         | 14 | 712   | B-pisc | 3.73 | 0.514  | 59 | 28 | 50 | 17 | 6  | 0  | 0.284  | 0.197  | 1 | 1 | 4 |
| <i>Gobiidae</i>                  | 10 | 43    | B-pisc | 2.93 | -2.214 | 4  | 0  | 46 | 47 | 0  | 7  | 0.288  | -0.483 | 1 | 1 | 4 |
| <i>Helicolenus dactylopterus</i> | 11 | 64    | B-pisc | 1.86 | -0.748 | 6  | 3  | 66 | 29 | 2  | 0  | 0.505  | -0.201 | 1 | 1 | 4 |
| <i>Helicolenus dactylopterus</i> | 12 | 1328  | B-pisc | 2.52 | -0.238 | 13 | 14 | 26 | 57 | 3  | 0  | -0.03  | -0.029 | 1 | 1 | 4 |
| <i>Helicolenus dactylopterus</i> | 13 | 1715  | B-pisc | 3.25 | 0.197  | 19 | 21 | 23 | 54 | 2  | 0  | -0.054 | 0.047  | 1 | 1 | 4 |
| <i>Helicolenus dactylopterus</i> | 14 | 183   | B-pisc | 4.32 | 0.658  | 30 | 24 | 18 | 53 | 4  | 1  | -0.053 | 0.075  | 1 | 1 | 4 |

|                                     |    |       |        |      |        |    |    |    |    |    |    |        |        |   |   |   |
|-------------------------------------|----|-------|--------|------|--------|----|----|----|----|----|----|--------|--------|---|---|---|
| <i>Hemitripterus americanus</i>     | 12 | 37    | B-pisc | 1.96 | 0.1    | 27 | 43 | 3  | 54 | 0  | 0  | -0.348 | 0.295  | 1 | 1 | 4 |
| <i>Hemitripterus americanus</i>     | 13 | 870   | B-pisc | 2.31 | 0.865  | 28 | 52 | 2  | 45 | 2  | 0  | -0.253 | 0.395  | 1 | 1 | 4 |
| <i>Hippoglossoides platessoides</i> | 13 | 5335  | B-pisc | 3.18 | -0.221 | 27 | 19 | 11 | 38 | 1  | 32 | -0.04  | 0.071  | 1 | 1 | 4 |
| <i>Hippoglossoides platessoides</i> | 14 | 508   | B-pisc | 3.58 | 0.052  | 41 | 20 | 6  | 46 | 0  | 29 | -0.119 | 0.061  | 1 | 1 | 4 |
| <i>Hippoglossus hippoglossus</i>    | 13 | 137   | B-pisc | 3.03 | 1.018  | 43 | 29 | 1  | 67 | 0  | 4  | -0.298 | 0.141  | 1 | 1 | 4 |
| <i>Hippoglossus hippoglossus</i>    | 14 | 166   | B-pisc | 3.09 | 1.231  | 54 | 45 | 1  | 50 | 1  | 3  | -0.225 | 0.295  | 1 | 1 | 4 |
| <i>Hyperoplus lanceolatus</i>       | 12 | 294   | B-pisc | 3.3  | -0.128 | 23 | 40 | 37 | 23 | 0  | 0  | 0.206  | 0.237  | 1 | 1 | 4 |
| <i>Lepidorhombus whiffiagonis</i>   | 11 | 44    | B-pisc | 2.08 | -0.765 | 10 | 2  | 55 | 39 | 5  | 0  | 0.34   | -0.239 | 1 | 1 | 4 |
| <i>Lepidorhombus whiffiagonis</i>   | 12 | 2379  | B-pisc | 2.46 | -0.385 | 17 | 19 | 58 | 19 | 4  | 0  | 0.414  | 0.136  | 1 | 1 | 4 |
| <i>Lepidorhombus whiffiagonis</i>   | 13 | 8879  | B-pisc | 2.68 | 0.097  | 26 | 47 | 33 | 18 | 2  | 0  | 0.196  | 0.374  | 1 | 1 | 4 |
| <i>Leucoraja naevus</i>             | 14 | 520   | B-pisc | 3.84 | 0.183  | 52 | 33 | 12 | 49 | 6  | 0  | -0.09  | 0.118  | 1 | 1 | 4 |
| <i>Leucoraja ocellata</i>           | 12 | 77    | B-pisc | 2.36 | -0.003 | 56 | 30 | 1  | 66 | 3  | 0  | -0.338 | 0.122  | 1 | 1 | 4 |
| <i>Leucoraja ocellata</i>           | 13 | 2547  | B-pisc | 2.73 | 0.428  | 60 | 37 | 2  | 58 | 2  | 0  | -0.254 | 0.192  | 1 | 1 | 4 |
| <i>Leucoraja ocellata</i>           | 14 | 3313  | B-pisc | 3.53 | 0.664  | 61 | 36 | 2  | 60 | 2  | 0  | -0.212 | 0.155  | 1 | 1 | 4 |
| <i>Leucoraja ocellata</i>           | 15 | 66    | B-pisc | 3.76 | 0.882  | 61 | 41 | 2  | 54 | 3  | 0  | -0.194 | 0.207  | 1 | 1 | 4 |
| <i>Limanda limanda</i>              | 14 | 241   | B-pisc | 3.84 | 0.064  | 35 | 36 | 6  | 45 | 0  | 12 | -0.108 | 0.161  | 1 | 1 | 4 |
| <i>Lophius piscatorius</i>          | 12 | 145   | B-pisc | 1.98 | 0.26   | 13 | 59 | 38 | 3  | 0  | 0  | 0.33   | 0.61   | 1 | 1 | 4 |
| <i>Melanogrammus aeglefinus</i>     | 13 | 23259 | B-pisc | 3.83 | -0.143 | 28 | 24 | 12 | 56 | 2  | 6  | -0.096 | 0.012  | 1 | 1 | 4 |
| <i>Melanogrammus aeglefinus</i>     | 14 | 12740 | B-pisc | 4.25 | 0.068  | 43 | 19 | 13 | 57 | 1  | 10 | -0.089 | -0.012 | 1 | 1 | 4 |
| <i>Melanogrammus aeglefinus</i>     | 15 | 1185  | B-pisc | 4.79 | 0.282  | 69 | 21 | 16 | 42 | 1  | 20 | 0.014  | 0.055  | 1 | 1 | 4 |
| <i>Merlangius merlangus</i>         | 12 | 29333 | B-pisc | 3.84 | -0.516 | 15 | 20 | 34 | 27 | 15 | 3  | 0.219  | 0.034  | 1 | 1 | 4 |
| <i>Merluccius albidus</i>           | 13 | 43    | B-pisc | 2.87 | 0.568  | 27 | 16 | 26 | 40 | 19 | 0  | 0.052  | 0.152  | 1 | 1 | 4 |
| <i>Merluccius bilinearis</i>        | 12 | 201   | B-pisc | 3.33 | -0.118 | 22 | 10 | 25 | 58 | 6  | 0  | -0.041 | -0.067 | 1 | 1 | 4 |
| <i>Merluccius bilinearis</i>        | 13 | 4959  | B-pisc | 3.6  | 0.454  | 24 | 25 | 16 | 56 | 3  | 0  | -0.106 | 0.071  | 1 | 1 | 4 |
| <i>Merluccius bilinearis</i>        | 15 | 50    | B-pisc | 4.3  | 0.825  | 24 | 36 | 16 | 44 | 4  | 0  | -0.037 | 0.188  | 1 | 1 | 4 |
| <i>Merluccius bilinearis</i>        | 14 | 4585  | B-pisc | 3.92 | 0.833  | 25 | 30 | 12 | 55 | 3  | 0  | -0.126 | 0.124  | 1 | 1 | 4 |
| <i>Merluccius merluccius</i>        | 12 | 9093  | B-pisc | 3.3  | 0.105  | 15 | 39 | 38 | 13 | 10 | 0  | 0.254  | 0.296  | 1 | 1 | 4 |
| <i>Micropogonias undulatus</i>      | 13 | 64    | B-pisc | 3.51 | -0.238 | 27 | 34 | 6  | 57 | 3  | 0  | -0.16  | 0.078  | 1 | 1 | 4 |
| <i>Pagellus erythrinus</i>          | 13 | 111   | B-pisc | 4.66 | -0.343 | 24 | 12 | 18 | 67 | 3  | 0  | -0.08  | -0.137 | 1 | 1 | 4 |

|                                |    |      |        |      |        |    |    |    |    |    |   |        |        |   |   |   |
|--------------------------------|----|------|--------|------|--------|----|----|----|----|----|---|--------|--------|---|---|---|
| <i>Pollachius pollachius</i>   | 13 | 110  | B-pisc | 4.03 | -0.774 | 28 | 23 | 16 | 60 | 0  | 1 | -0.06  | -0.086 | 1 | 1 | 4 |
| <i>Pollachius virens</i>       | 13 | 725  | B-pisc | 4.42 | 0.937  | 47 | 44 | 18 | 35 | 3  | 1 | 0.012  | 0.272  | 1 | 1 | 4 |
| <i>Raja eglanteria</i>         | 13 | 657  | B-pisc | 2.39 | 0.548  | 58 | 23 | 1  | 67 | 9  | 0 | -0.348 | 0.126  | 1 | 1 | 4 |
| <i>Raja eglanteria</i>         | 14 | 580  | B-pisc | 3.19 | 0.641  | 59 | 23 | 3  | 70 | 5  | 0 | -0.259 | 0.066  | 1 | 1 | 4 |
| <i>Raja eglanteria</i>         | 12 | 82   | B-pisc | 1.62 | 0.29   | 60 | 35 | 2  | 57 | 5  | 0 | -0.399 | 0.271  | 1 | 1 | 4 |
| <i>Scophthalmus maximus</i>    | 11 | 141  | B-pisc | 2.14 | -1.06  | 7  | 32 | 24 | 44 | 0  | 0 | 0.104  | 0.161  | 1 | 1 | 4 |
| <i>Scophthalmus maximus</i>    | 12 | 103  | B-pisc | 3.14 | -0.594 | 11 | 44 | 24 | 32 | 0  | 0 | 0.095  | 0.222  | 1 | 1 | 4 |
| <i>Scophthalmus rhombus</i>    | 12 | 96   | B-pisc | 2.32 | -0.455 | 12 | 22 | 50 | 27 | 1  | 0 | 0.348  | 0.134  | 1 | 1 | 4 |
| <i>Scyliorhinus canicula</i>   | 12 | 1223 | B-pisc | 3.38 | -0.212 | 22 | 11 | 40 | 42 | 7  | 0 | 0.131  | -0.041 | 1 | 1 | 4 |
| <i>Scyliorhinus canicula</i>   | 13 | 6587 | B-pisc | 3.31 | 0.331  | 38 | 25 | 18 | 51 | 6  | 0 | -0.078 | 0.091  | 1 | 1 | 4 |
| <i>Scyliorhinus canicula</i>   | 14 | 5811 | B-pisc | 3.88 | 0.659  | 54 | 41 | 14 | 42 | 3  | 0 | -0.062 | 0.214  | 1 | 1 | 4 |
| <i>Sebastes fasciatus</i>      | 14 | 93   | B-pisc | 3.81 | 0.244  | 29 | 16 | 19 | 65 | 0  | 0 | -0.106 | -0.033 | 1 | 1 | 4 |
| <i>Sebastes fasciatus</i>      | 13 | 239  | B-pisc | 3.65 | 0.354  | 30 | 12 | 19 | 69 | 0  | 0 | -0.131 | -0.052 | 1 | 1 | 4 |
| <i>Spondyliosoma cantharus</i> | 14 | 171  | B-pisc | 2.99 | 0.532  | 33 | 13 | 24 | 45 | 16 | 2 | 0.01   | 0.091  | 1 | 1 | 4 |
| <i>Squalus acanthias</i>       | 12 | 55   | B-pisc | 3.24 | 0.642  | 46 | 29 | 26 | 26 | 20 | 0 | 0.115  | 0.272  | 1 | 1 | 4 |
| <i>Trachinus draco</i>         | 13 | 193  | B-pisc | 4.4  | -0.009 | 25 | 29 | 36 | 24 | 10 | 0 | 0.217  | 0.14   | 1 | 1 | 4 |
| <i>Trachurus trachurus</i>     | 14 | 195  | B-pisc | 4.73 | 0.141  | 37 | 34 | 42 | 17 | 7  | 0 | 0.292  | 0.2    | 1 | 1 | 4 |
| <i>Trisopterus minutus</i>     | 11 | 31   | B-pisc | 2.37 | -1.271 | 9  | 0  | 47 | 43 | 10 | 0 | 0.278  | -0.364 | 1 | 1 | 4 |
| <i>Urophycis regia</i>         | 12 | 137  | B-pisc | 3.18 | -0.318 | 22 | 9  | 17 | 68 | 5  | 0 | -0.135 | -0.107 | 1 | 1 | 4 |
| <i>Urophycis regia</i>         | 15 | 42   | B-pisc | 4.38 | 0.133  | 22 | 22 | 6  | 69 | 2  | 0 | -0.18  | -0.014 | 1 | 1 | 4 |
| <i>Urophycis regia</i>         | 13 | 1930 | B-pisc | 3.43 | 0.263  | 23 | 16 | 13 | 65 | 5  | 0 | -0.151 | -0.004 | 1 | 1 | 4 |
| <i>Urophycis regia</i>         | 14 | 1645 | B-pisc | 3.83 | 0.334  | 24 | 18 | 11 | 64 | 7  | 0 | -0.146 | 0.003  | 1 | 1 | 4 |
| <i>Urophycis tenuis</i>        | 15 | 40   | B-pisc | 3.68 | 1.485  | 40 | 48 | 0  | 52 | 0  | 0 | -0.228 | 0.287  | 1 | 1 | 4 |
| <i>Urophycis tenuis</i>        | 13 | 1903 | B-pisc | 2.45 | 0.75   | 42 | 39 | 1  | 59 | 1  | 0 | -0.3   | 0.247  | 1 | 1 | 4 |
| <i>Urophycis tenuis</i>        | 14 | 2383 | B-pisc | 3.39 | 1.321  | 43 | 41 | 1  | 56 | 1  | 0 | -0.231 | 0.238  | 1 | 1 | 4 |
| <i>Zeus faber</i>              | 12 | 512  | B-pisc | 2    | -0.122 | 11 | 44 | 51 | 2  | 2  | 0 | 0.469  | 0.467  | 1 | 1 | 4 |
| <i>Amblyraja radiata</i>       | 15 | 103  | Pisc   | 4.45 | 1.353  | 82 | 65 | 1  | 34 | 0  | 0 | -0.118 | 0.432  | 1 | 3 | 5 |
| <i>Cynoscion regalis</i>       | 13 | 883  | Pisc   | 3.38 | 0.333  | 28 | 67 | 14 | 16 | 3  | 0 | 0.052  | 0.445  | 1 | 3 | 5 |
| <i>Cynoscion regalis</i>       | 12 | 57   | Pisc   | 2.55 | 0.234  | 30 | 74 | 11 | 12 | 3  | 0 | 0.033  | 0.585  | 1 | 3 | 5 |

|                                   |    |       |      |      |       |     |    |    |    |    |   |        |       |   |   |   |
|-----------------------------------|----|-------|------|------|-------|-----|----|----|----|----|---|--------|-------|---|---|---|
| <i>Cynoscion regalis</i>          | 14 | 651   | Pisc | 3.78 | 0.44  | 30  | 72 | 10 | 15 | 3  | 0 | 0.045  | 0.467 | 1 | 3 | 5 |
| <i>Eutrigla gurnardus</i>         | 14 | 476   | Pisc | 2.96 | 0.574 | 38  | 69 | 7  | 13 | 2  | 9 | 0      | 0.54  | 1 | 3 | 5 |
| <i>Gadus morhua</i>               | 15 | 28530 | Pisc | 4.24 | 0.972 | 78  | 57 | 14 | 26 | 1  | 2 | 0.022  | 0.378 | 1 | 3 | 5 |
| <i>Gadus morhua</i>               | 16 | 707   | Pisc | 5.27 | 1.681 | 125 | 83 | 1  | 15 | 1  | 0 | 0.008  | 0.633 | 1 | 3 | 5 |
| <i>Hippoglossus hippoglossus</i>  | 15 | 42    | Pisc | 3.03 | 1.699 | 77  | 56 | 3  | 30 | 10 | 1 | -0.15  | 0.475 | 1 | 3 | 5 |
| <i>Hyperoplus lanceolatus</i>     | 13 | 133   | Pisc | 1.98 | 0.438 | 30  | 92 | 8  | 0  | 0  | 0 | 0.066  | 0.835 | 1 | 3 | 5 |
| <i>Lepidorhombus whiffiagonis</i> | 14 | 545   | Pisc | 3.36 | 0.645 | 42  | 70 | 7  | 19 | 2  | 2 | -0.017 | 0.476 | 1 | 3 | 5 |
| <i>Lophius americanus</i>         | 12 | 44    | Pisc | 1.1  | 0.583 | 33  | 79 | 0  | 2  | 19 | 0 | -0.1   | 0.98  | 1 | 3 | 5 |
| <i>Lophius americanus</i>         | 13 | 1081  | Pisc | 1.89 | 1.104 | 40  | 78 | 1  | 9  | 12 | 0 | -0.107 | 0.797 | 1 | 3 | 5 |
| <i>Lophius americanus</i>         | 14 | 1291  | Pisc | 2.65 | 1.658 | 44  | 80 | 1  | 8  | 11 | 0 | -0.071 | 0.723 | 1 | 3 | 5 |
| <i>Lophius americanus</i>         | 15 | 45    | Pisc | 3.07 | 1.787 | 46  | 89 | 2  | 7  | 2  | 0 | -0.022 | 0.705 | 1 | 3 | 5 |
| <i>Lophius budegassa</i>          | 12 | 168   | Pisc | 1.74 | 0.233 | 12  | 77 | 22 | 1  | 0  | 0 | 0.204  | 0.769 | 1 | 3 | 5 |
| <i>Lophius budegassa</i>          | 13 | 216   | Pisc | 2.17 | 0.676 | 19  | 80 | 14 | 6  | 0  | 0 | 0.083  | 0.718 | 1 | 3 | 5 |
| <i>Lophius budegassa</i>          | 14 | 372   | Pisc | 2.39 | 1.35  | 38  | 92 | 1  | 6  | 1  | 0 | -0.045 | 0.794 | 1 | 3 | 5 |
| <i>Lophius budegassa</i>          | 15 | 61    | Pisc | 2.61 | 1.825 | 64  | 90 | 0  | 5  | 5  | 0 | -0.055 | 0.777 | 1 | 3 | 5 |
| <i>Lophius piscatorius</i>        | 13 | 1279  | Pisc | 2.08 | 0.721 | 19  | 81 | 14 | 4  | 1  | 0 | 0.092  | 0.743 | 1 | 3 | 5 |
| <i>Lophius piscatorius</i>        | 14 | 682   | Pisc | 2.08 | 1.549 | 42  | 92 | 1  | 5  | 2  | 0 | -0.055 | 0.846 | 1 | 3 | 5 |
| <i>Lophius piscatorius</i>        | 15 | 225   | Pisc | 2.36 | 1.927 | 76  | 85 | 0  | 10 | 5  | 0 | -0.091 | 0.773 | 1 | 3 | 5 |
| <i>Merlangius merlangus</i>       | 13 | 62030 | Pisc | 3.55 | 0.329 | 27  | 55 | 17 | 23 | 5  | 1 | 0.042  | 0.351 | 1 | 3 | 5 |
| <i>Merlangius merlangus</i>       | 14 | 4175  | Pisc | 3.29 | 0.732 | 40  | 67 | 7  | 22 | 3  | 1 | -0.037 | 0.459 | 1 | 3 | 5 |
| <i>Merluccius merluccius</i>      | 13 | 7379  | Pisc | 3.41 | 1.035 | 27  | 84 | 8  | 6  | 1  | 1 | 0.045  | 0.616 | 1 | 3 | 5 |
| <i>Merluccius merluccius</i>      | 14 | 2044  | Pisc | 3.46 | 1.481 | 43  | 94 | 3  | 2  | 1  | 0 | 0.022  | 0.713 | 1 | 3 | 5 |
| <i>Merluccius merluccius</i>      | 15 | 58    | Pisc | 2.72 | 1.916 | 84  | 97 | 0  | 3  | 0  | 0 | -0.023 | 0.828 | 1 | 3 | 5 |
| <i>Molva macrophthalma</i>        | 12 | 993   | Pisc | 1.78 | 0.218 | 24  | 73 | 26 | 1  | 0  | 0 | 0.247  | 0.742 | 1 | 3 | 5 |
| <i>Molva macrophthalma</i>        | 13 | 131   | Pisc | 2.24 | 0.683 | 37  | 76 | 21 | 3  | 0  | 0 | 0.15   | 0.696 | 1 | 3 | 5 |
| <i>Molva macrophthalma</i>        | 14 | 37    | Pisc | 3.21 | 1.334 | 77  | 78 | 22 | 0  | 0  | 0 | 0.166  | 0.631 | 1 | 3 | 5 |
| <i>Morone saxatilis</i>           | 13 | 174   | Pisc | 2.11 | 0.629 | 63  | 70 | 2  | 25 | 3  | 0 | -0.149 | 0.598 | 1 | 3 | 5 |
| <i>Morone saxatilis</i>           | 14 | 296   | Pisc | 2.83 | 1.551 | 67  | 79 | 1  | 18 | 1  | 0 | -0.086 | 0.632 | 1 | 3 | 5 |
| <i>Paralichthys dentatus</i>      | 12 | 86    | Pisc | 2.09 | 0.39  | 39  | 48 | 7  | 27 | 18 | 0 | -0.201 | 0.518 | 1 | 3 | 5 |

|                                     |    |      |      |      |        |     |    |    |    |    |   |        |       |   |   |   |
|-------------------------------------|----|------|------|------|--------|-----|----|----|----|----|---|--------|-------|---|---|---|
| <i>Paralichthys dentatus</i>        | 13 | 1057 | Pisc | 2.42 | 0.816  | 41  | 52 | 3  | 20 | 25 | 0 | -0.195 | 0.592 | 1 | 3 | 5 |
| <i>Paralichthys dentatus</i>        | 14 | 1275 | Pisc | 3.09 | 1.063  | 41  | 50 | 1  | 22 | 27 | 0 | -0.169 | 0.526 | 1 | 3 | 5 |
| <i>Pollachius pollachius</i>        | 14 | 38   | Pisc | 4.27 | 0.572  | 51  | 59 | 20 | 20 | 1  | 0 | 0.103  | 0.378 | 1 | 3 | 5 |
| <i>Pollachius virens</i>            | 14 | 7219 | Pisc | 4.17 | 0.959  | 52  | 58 | 26 | 14 | 2  | 0 | 0.161  | 0.413 | 1 | 3 | 5 |
| <i>Pollachius virens</i>            | 15 | 2024 | Pisc | 4.23 | 0.98   | 81  | 62 | 30 | 5  | 2  | 2 | 0.232  | 0.465 | 1 | 3 | 5 |
| <i>Pollachius virens</i>            | 16 | 210  | Pisc | 4.31 | 1.173  | 125 | 79 | 20 | 0  | 1  | 0 | 0.196  | 0.582 | 1 | 3 | 5 |
| <i>Pomatomus saltatrix</i>          | 12 | 72   | Pisc | 1.86 | 0.392  | 35  | 76 | 6  | 0  | 18 | 0 | 0.014  | 0.842 | 1 | 3 | 5 |
| <i>Pomatomus saltatrix</i>          | 13 | 956  | Pisc | 2.06 | 0.707  | 38  | 79 | 4  | 1  | 16 | 0 | -0.04  | 0.82  | 1 | 3 | 5 |
| <i>Pomatomus saltatrix</i>          | 14 | 850  | Pisc | 2.8  | 1.181  | 43  | 75 | 3  | 1  | 21 | 0 | -0.03  | 0.742 | 1 | 3 | 5 |
| <i>Reinhardtius hippoglossoides</i> | 14 | 190  | Pisc | 3.03 | 0.644  | 53  | 65 | 14 | 14 | 1  | 6 | 0.048  | 0.498 | 1 | 3 | 5 |
| <i>Salmo trutta</i>                 | 14 | 38   | Pisc | 4.36 | -0.018 | 41  | 79 | 0  | 18 | 0  | 3 | 0.028  | 0.515 | 1 | 3 | 5 |
| <i>Scophthalmus maximus</i>         | 14 | 2058 | Pisc | 2.55 | 0.856  | 36  | 92 | 3  | 4  | 1  | 0 | -0.01  | 0.752 | 1 | 3 | 5 |
| <i>Scophthalmus maximus</i>         | 15 | 563  | Pisc | 2.71 | 1.205  | 53  | 98 | 0  | 2  | 0  | 0 | -0.012 | 0.801 | 1 | 3 | 5 |
| <i>Scophthalmus rhombus</i>         | 13 | 219  | Pisc | 2.79 | -0.016 | 24  | 67 | 18 | 2  | 13 | 0 | 0.177  | 0.58  | 1 | 3 | 5 |
| <i>Scophthalmus rhombus</i>         | 14 | 1111 | Pisc | 2.58 | 0.895  | 36  | 86 | 3  | 3  | 8  | 0 | -0.023 | 0.729 | 1 | 3 | 5 |
| <i>Squalus acanthias</i>            | 13 | 3417 | Pisc | 3.39 | 1.302  | 73  | 58 | 5  | 25 | 12 | 0 | -0.081 | 0.459 | 1 | 3 | 5 |
| <i>Squalus acanthias</i>            | 14 | 5491 | Pisc | 3.34 | 1.373  | 77  | 64 | 4  | 21 | 11 | 0 | -0.071 | 0.503 | 1 | 3 | 5 |
| <i>Squalus acanthias</i>            | 15 | 360  | Pisc | 3.52 | 1.577  | 91  | 62 | 3  | 22 | 14 | 0 | -0.083 | 0.508 | 1 | 3 | 5 |
| <i>Zenopsis conchifer</i>           | 13 | 73   | Pisc | 2.48 | 1.019  | 34  | 62 | 6  | 0  | 32 | 0 | -0.122 | 0.786 | 1 | 3 | 5 |
| <i>Zenopsis conchifer</i>           | 14 | 48   | Pisc | 2.42 | 1.599  | 38  | 59 | 2  | 0  | 39 | 0 | -0.181 | 0.857 | 1 | 3 | 5 |
| <i>Zeus faber</i>                   | 13 | 944  | Pisc | 2.73 | 0.52   | 21  | 74 | 23 | 2  | 1  | 0 | 0.171  | 0.611 | 1 | 3 | 5 |
| <i>Zeus faber</i>                   | 14 | 625  | Pisc | 2.4  | 1.275  | 38  | 94 | 5  | 1  | 0  | 0 | 0.007  | 0.81  | 1 | 3 | 5 |

1  
2



1  
2  
3  
4  
5  
6  
7  
8  
9  
10  
11  
12  
13  
14  
15  
16  
17  
18  
19  
20  
21  
22  
23  
24  
25  
26  
27  
28  
29  
30  
31  
32  
33

Table S4. Otter trawl surveys, the OSPAR Region in which they operate, the period over which they have been undertaken and the number of unique hauls (*n*).

| Survey acronym <sup>1</sup> | OSPAR Region <sup>1</sup> | Quarter <sup>1</sup> | Years     | <i>n</i> |
|-----------------------------|---------------------------|----------------------|-----------|----------|
| BBICFraOT4                  | BBIC                      | 4                    | 1997-2020 | 1693     |
| BBICnSpaOT4                 | BBIC                      | 4                    | 2011-2018 | 902      |
| BBICPorOT4                  | BBIC                      | 4                    | 2005-2018 | 1045     |
| BBICsSpaOT1                 | BBIC                      | 1                    | 2000-2020 | 673      |
| BBICsSpaOT4                 | BBIC                      | 4                    | 2002-2020 | 691      |
| CSFraOT4                    | CS                        | 4                    | 1997-2020 | 1180     |
| CSIreOT4                    | CS                        | 4                    | 2003-2020 | 2353     |
| CSNirOT1                    | CS                        | 1                    | 2008-2020 | 756      |
| CSNirOT4                    | CS                        | 4                    | 2009-2020 | 698      |
| CSScoOT1                    | CS                        | 1                    | 1997-2020 | 1082     |
| CSScoOT4                    | CS                        | 4                    | 1997-2020 | 1210     |
| GNSFraOT4                   | GNS                       | 4                    | 1998-2020 | 1907     |
| GNSIntOT1                   | GNS                       | 1                    | 1997-2020 | 8827     |
| WAScoOT3                    | WA                        | 3                    | 1999-2020 | 701      |
| WASpaOT3                    | WA                        | 3                    | 2006-2018 | 1019     |

<sup>1</sup> Survey acronym convention: First 2 to 4 capitalised letters indicate the OSPAR Region (BBIC: Bay of Biscay and Iberian Coast; CS: Celtic Seas; GNS: Greater North Sea; WA – Wider Atlantic). Next capitalised and lowercase letters signify the country involved (Spa: Spain; Bel: Belgium; Por: Portugal; Fra: France; Eng: England; Ire: Republic of Ireland; Nir: Northern Ireland; Sco: Scotland; Ger: Germany; Int: International; Net: The Netherlands. International refers to the two international bottom trawl surveys carried out in the Greater North Sea under the International Council for the Exploration of the Sea (ICES). In the Bay of Biscay and Iberian Coast Region, Spanish surveys are further delimited by (n) for surveys operating in the northern Iberian Coast area and (s) for surveys operating in the southern Iberian Coast area. Next two capitalised letters indicate the type of survey (OT: otter trawl). Final number indicates the season in which the survey is primarily undertaken (1: January to March; 3: July to September; 4: October to December).

1 *Feeding guild classification*

2

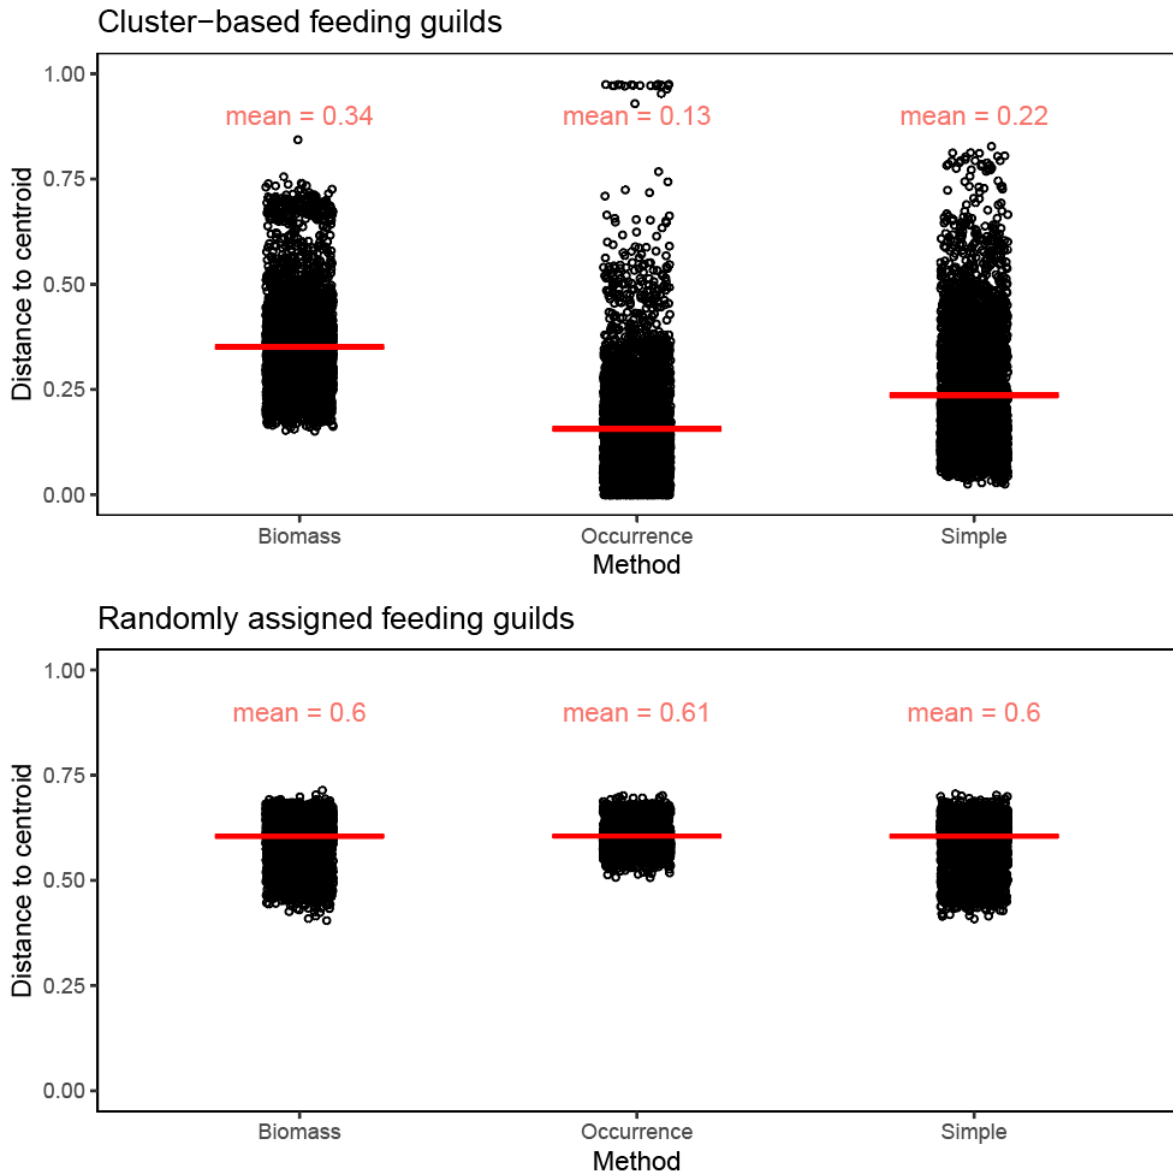

3

4 Figure S2: Differences in cluster-based methods used to assign feeding guilds and those randomly  
 5 generated measured using mean distance to centroid of re-sampled stomach contents data (see also  
 6 Table S7). Each point shows the distance to centroid per feeding guild per resampling event per  
 7 method. Feeding guild composition was more similar following resampling where distance to centroid  
 8 was lower.

9

10 Table S5. Tukey's all-pairwise comparisons of mean distance to centroid (square root transformed)  
 11 between feeding guild classification methods following analysis of variance of re-sampled stomach  
 12 contents data.

| Test                 | Fit    | SE    | t-value | p-value |
|----------------------|--------|-------|---------|---------|
| Occurrence - Biomass | -0.22  | 0.003 | -78.862 | 0.001   |
| Trait - Biomass      | -0.117 | 0.003 | -41.920 | 0.001   |
| Trait - Occurrence   | 0.103  | 0.003 | 36.977  | 0.001   |

13

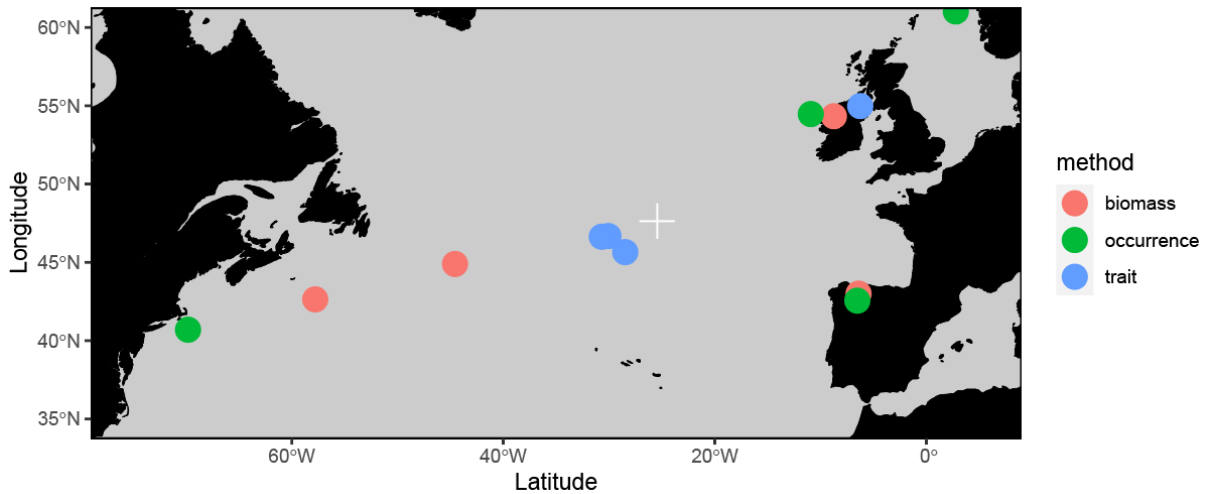

1  
 2 Figure S3: Method-specific feeding guild spatial centroids. Guilds for the trait method were closest to  
 3 the data centroid (white cross) which shows that each guild contained fish found widely across the  
 4 study region. The occurrence and biomass methods were more susceptible to large spatial gradients  
 5 in prey composition meaning guilds were composed of fish largely found in the same area.  
 6

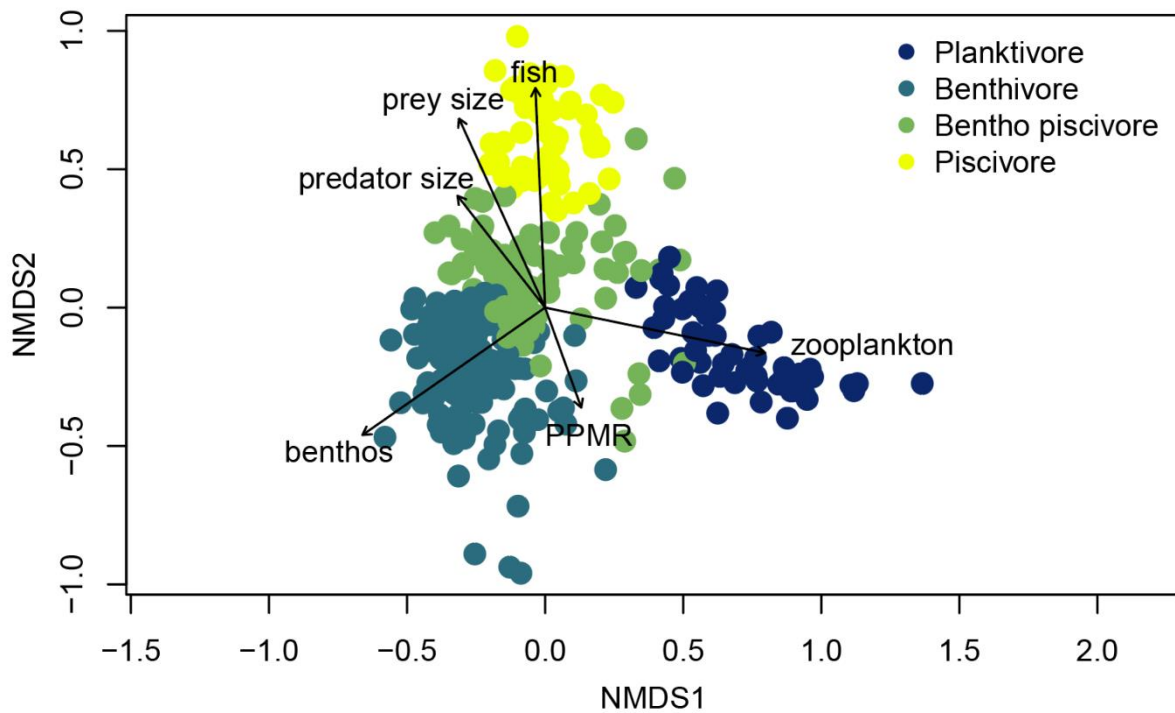

7  
 8 Figure S4: A non-metric multidimensional scaling analysis of the dissimilarities used in our cluster  
 9 analysis which provide a more nuanced understanding (i.e., bounded data as opposed to categorical)  
 10 of different predator feeding traits in relation to others' (see Table S3 for unique species size class axis  
 11 scores). Arrows show the direction of increasing values for the variables used in our cluster analysis.  
 12  
 13  
 14

15 Table S6. Taxa and sizes observed in the survey data with insufficient stomach contents data to be  
 16 classified into feeding guilds. Fish are ordered by the sum of their biomass (kg per km<sup>2</sup>) observed  
 17 across all hauls to help direct future stomach sampling by prioritising those contributing most to the  
 18 fish assemblage across the study region.

| <b>Taxa</b>                     | <b>Min<br/>cm</b> | <b>Max<br/>cm</b> | <b>Sum kg<br/>per km2</b> |
|---------------------------------|-------------------|-------------------|---------------------------|
| <i>Capros aper</i>              | 8                 | 16                | 3240041                   |
| <i>Trachurus trachurus</i>      | 5                 | 10                | 1042657                   |
| <i>Capros aper</i>              | 4                 | 8                 | 441428                    |
| <i>Trachurus picturatus</i>     | 9                 | 16                | 428259                    |
| <i>Sebastes viviparus</i>       | 15                | 28                | 419466                    |
| <i>Sardina pilchardus</i>       | 11                | 19                | 389717                    |
| <i>Gadiculus argenteus</i>      | 10                | 18                | 360658                    |
| <i>Argentina sphyraena</i>      | 21                | 38                | 337196                    |
| <i>Trachurus picturatus</i>     | 16                | 30                | 313069                    |
| <i>Engraulis encrasicolus</i>   | 6                 | 11                | 265764                    |
| <i>Capros aper</i>              | 16                | 31                | 242370                    |
| <i>Sebastes viviparus</i>       | 8                 | 15                | 221067                    |
| <i>Mustelus asterias</i>        | 50                | 92                | 176023                    |
| <i>Molva molva</i>              | 77                | 142               | 132724                    |
| <i>Scomber colias</i>           | 19                | 33                | 114984                    |
| <i>Galeorhinus galeus</i>       | 82                | 153               | 111270                    |
| <i>Conger conger</i>            | 110               | 191               | 95179                     |
| <i>Gadiculus argenteus</i>      | 6                 | 10                | 89462                     |
| <i>Trachurus mediterraneus</i>  | 18                | 34                | 86786                     |
| <i>Scyliorhinus stellaris</i>   | 85                | 160               | 84060                     |
| <i>Platichthys flesus</i>       | 33                | 60                | 79759                     |
| <i>Maurolicus muelleri</i>      | 36                | 58                | 77134                     |
| <i>Boops boops</i>              | 18                | 33                | 76843                     |
| <i>Lepidion eques</i>           | 23                | 39                | 76313                     |
| <i>Molva molva</i>              | 42                | 77                | 73287                     |
| <i>Diplodus vulgaris</i>        | 15                | 27                | 68597                     |
| <i>Dipturus batis</i>           | 102               | 187               | 61092                     |
| <i>Mustelus asterias</i>        | 92                | 167               | 55315                     |
| <i>Raja brachyura</i>           | 70                | 125               | 55209                     |
| <i>Chimaera monstrosa</i>       | 30                | 55                | 54496                     |
| <i>Deania calcea</i>            | 87                | 154               | 54264                     |
| <i>Dipturus batis</i>           | 187               | 343               | 48680                     |
| <i>Dipturus batis</i>           | 55                | 102               | 41609                     |
| <i>Argentina silus</i>          | 11                | 20                | 40851                     |
| <i>Scyliorhinus stellaris</i>   | 45                | 85                | 36300                     |
| <i>Trachurus mediterraneus</i>  | 10                | 18                | 32564                     |
| <i>Dicentrarchus labrax</i>     | 61                | 114               | 30554                     |
| <i>Pollachius pollachius</i>    | 64                | 116               | 30073                     |
| <i>Micromesistius poutassou</i> | 38                | 69                | 29757                     |
| <i>Raja brachyura</i>           | 39                | 70                | 29703                     |
| <i>Scomber colias</i>           | 10                | 19                | 29396                     |
| <i>Scymnodon ringens</i>        | 70                | 128               | 27806                     |
| <i>Deania calcea</i>            | 49                | 87                | 26632                     |
| <i>Cyclopterus lumpus</i>       | 38                | 71                | 23205                     |

|                                   |     |     |       |
|-----------------------------------|-----|-----|-------|
| <i>Lophius piscatorius</i>        | 112 | 217 | 22100 |
| <i>Dipturus nidarosiensis</i>     | 126 | 226 | 21348 |
| <i>Raja undulata</i>              | 74  | 137 | 19993 |
| <i>Glyptocephalus cynoglossus</i> | 38  | 67  | 19115 |
| <i>Serranus hepatus</i>           | 95  | 175 | 18942 |
| <i>Cyclopterus lumpus</i>         | 20  | 38  | 18593 |
| <i>Sprattus sprattus</i>          | 3   | 6   | 18436 |
| <i>Coelorinchus caelorhincus</i>  | 8   | 15  | 16722 |
| <i>Galeorhinus galeus</i>         | 153 | 286 | 15889 |
| <i>Argentina sphyraena</i>        | 6   | 11  | 15738 |
| <i>Sardina pilchardus</i>         | 6   | 11  | 15568 |
| <i>Boops boops</i>                | 10  | 18  | 14845 |
| <i>Micromesistius poutassou</i>   | 6   | 12  | 14300 |
| <i>Molva macrophthalma</i>        | 98  | 174 | 14125 |
| <i>Mustelus mustelus</i>          | 46  | 90  | 12942 |
| <i>Mora moro</i>                  | 34  | 61  | 12709 |
| <i>Leucoraja circularis</i>       | 78  | 142 | 12328 |
| <i>Myoxocephalus scorpius</i>     | 15  | 28  | 12301 |
| <i>Spondyllosoma cantharus</i>    | 9   | 16  | 11753 |
| <i>Raja microocellata</i>         | 68  | 123 | 11751 |
| <i>Raja montagui</i>              | 65  | 115 | 10425 |
| <i>Sparus aurata</i>              | 16  | 30  | 10399 |
| <i>Trachurus mediterraneus</i>    | 5   | 10  | 10053 |
| <i>Dipturus batis</i>             | 30  | 55  | 9798  |
| <i>Coelorinchus caelorhincus</i>  | 27  | 49  | 9779  |
| <i>Dasyatis pastinaca</i>         | 62  | 116 | 9115  |
| <i>Mustelus asterias</i>          | 28  | 50  | 8518  |
| <i>Trachurus mediterraneus</i>    | 34  | 65  | 8370  |
| <i>Scymnodon ringens</i>          | 39  | 70  | 8338  |
| <i>Callionymus maculatus</i>      | 11  | 21  | 8108  |
| <i>Hoplostethus mediterraneus</i> | 27  | 50  | 8077  |
| <i>Mora moro</i>                  | 19  | 34  | 7896  |
| <i>Leucoraja circularis</i>       | 44  | 78  | 7040  |
| <i>Microchirus variegatus</i>     | 18  | 33  | 6951  |
| <i>Raja undulata</i>              | 40  | 74  | 6807  |
| <i>Galeorhinus galeus</i>         | 44  | 82  | 6685  |
| <i>Etmopterus spinax</i>          | 44  | 79  | 6577  |
| <i>Phycis blennoides</i>          | 66  | 119 | 6512  |
| <i>Epigonus telescopus</i>        | 17  | 32  | 6417  |
| <i>Trachinus draco</i>            | 11  | 20  | 6258  |
| <i>Chimaera monstrosa</i>         | 16  | 30  | 5688  |
| <i>Cepola macrophthalma</i>       | 21  | 54  | 5475  |
| <i>Coelorinchus caelorhincus</i>  | 49  | 89  | 5401  |
| <i>Arnoglossus laterna</i>        | 104 | 180 | 5207  |
| <i>Raja microocellata</i>         | 37  | 68  | 5060  |
| <i>Lepidion eques</i>             | 14  | 23  | 5014  |

|                                   |     |     |      |
|-----------------------------------|-----|-----|------|
| <i>Zeus faber</i>                 | 55  | 105 | 4936 |
| <i>Raja brachyura</i>             | 125 | 224 | 4908 |
| <i>Macroramphosus scolopax</i>    | 12  | 23  | 4820 |
| <i>Buglossidium luteum</i>        | 9   | 16  | 4815 |
| <i>Trachyrincus scabrus</i>       | 16  | 28  | 4786 |
| <i>Boops boops</i>                | 33  | 61  | 4731 |
| <i>Diplodus vulgaris</i>          | 27  | 50  | 4630 |
| <i>Brosme brosme</i>              | 61  | 109 | 4603 |
| <i>Buglossidium luteum</i>        | 5   | 9   | 4532 |
| <i>Dasyatis pastinaca</i>         | 34  | 62  | 4519 |
| <i>Aphanopus carbo</i>            | 69  | 122 | 4475 |
| <i>Glyptocephalus cynoglossus</i> | 13  | 22  | 4232 |
| <i>Argyrosomus regius</i>         | 35  | 67  | 4138 |
| <i>Lamna nasus</i>                | 102 | 193 | 4120 |
| <i>Sparus aurata</i>              | 30  | 56  | 4022 |
| <i>Agonus cataphractus</i>        | 9   | 18  | 3903 |
| <i>Trachurus picturatus</i>       | 30  | 54  | 3795 |
| <i>Conger conger</i>              | 191 | 333 | 3780 |
| <i>Mustelus mustelus</i>          | 90  | 178 | 3735 |
| <i>Scyliorhinus stellaris</i>     | 24  | 45  | 3647 |
| <i>Merlangius merlangus</i>       | 227 | 416 | 3638 |
| <i>Molva molva</i>                | 23  | 42  | 3553 |
| <i>Molva molva</i>                | 142 | 262 | 3511 |
| <i>Callionymus maculatus</i>      | 5   | 11  | 3439 |
| <i>Trisopterus luscus</i>         | 5   | 9   | 3383 |
| <i>Malacocephalus laevis</i>      | 28  | 54  | 3366 |
| <i>Leucoraja fullonica</i>        | 46  | 83  | 3341 |
| <i>Brama brama</i>                | 29  | 51  | 3266 |
| <i>Malacocephalus laevis</i>      | 54  | 103 | 3219 |
| <i>Argyrosomus regius</i>         | 18  | 35  | 3207 |
| <i>Leucoraja fullonica</i>        | 83  | 151 | 3188 |
| <i>Dalatias licha</i>             | 74  | 136 | 3188 |
| <i>Scorpaena scrofa</i>           | 27  | 51  | 3183 |
| <i>Balistes capriscus</i>         | 29  | 53  | 3133 |
| <i>Chelon labrosus</i>            | 31  | 56  | 3091 |
| <i>Atherina presbyter</i>         | 6   | 11  | 3079 |
| <i>Dipturus oxyrinchus</i>        | 81  | 139 | 3021 |
| <i>Trachinus draco</i>            | 37  | 67  | 2950 |
| <i>Nezumia aequalis</i>           | 25  | 47  | 2763 |
| <i>Zenopsis conchifer</i>         | 57  | 99  | 2762 |
| <i>Dicologlossa cuneata</i>       | 11  | 20  | 2735 |
| <i>Mola mola</i>                  | 36  | 66  | 2683 |
| <i>Hydrolagus mirabilis</i>       | 24  | 44  | 2618 |
| <i>Mola mola</i>                  | 19  | 36  | 2615 |
| <i>Callionymus lyra</i>           | 5   | 10  | 2591 |
| <i>Merlangius merlangus</i>       | 67  | 123 | 2547 |

|                                  |     |     |      |
|----------------------------------|-----|-----|------|
| <i>Spondyliosoma cantharus</i>   | 5   | 9   | 2470 |
| <i>Dasyatis pastinaca</i>        | 116 | 215 | 2446 |
| <i>Coelorinchus caelorhincus</i> | 15  | 27  | 2354 |
| <i>Sarda sarda</i>               | 21  | 38  | 2353 |
| <i>Coelorinchus caelorhincus</i> | 89  | 163 | 2336 |
| <i>Pagellus acarne</i>           | 9   | 16  | 2319 |
| <i>Cepola macrophthalma</i>      | 54  | 137 | 2262 |
| <i>Alosa fallax</i>              | 38  | 69  | 2262 |
| <i>Chelidonichthys lucerna</i>   | 61  | 114 | 2217 |
| <i>Macroramphosus scolopax</i>   | 6   | 12  | 2213 |
| <i>Myoxocephalus scorpius</i>    | 8   | 15  | 2188 |
| <i>Coelorinchus caelorhincus</i> | 4   | 8   | 2137 |
| <i>Diplodus bellottii</i>        | 8   | 15  | 2086 |
| <i>Dalatias licha</i>            | 41  | 74  | 2039 |
| <i>Umbrina canariensis</i>       | 17  | 31  | 2039 |
| <i>Somniosus microcephalus</i>   | 94  | 168 | 2018 |
| <i>Raja brachyura</i>            | 22  | 39  | 1947 |
| <i>Maurollicus muelleri</i>      | 23  | 36  | 1858 |
| <i>Entelurus aequoreus</i>       | 18  | 37  | 1814 |
| <i>Alosa fallax</i>              | 21  | 38  | 1813 |
| <i>Myliobatis aquila</i>         | 38  | 82  | 1795 |
| <i>Torpedo marmorata</i>         | 27  | 51  | 1753 |
| <i>Beryx splendens</i>           | 26  | 48  | 1740 |
| <i>Myxine glutinosa</i>          | 21  | 36  | 1738 |
| <i>Lamna nasus</i>               | 193 | 364 | 1678 |
| <i>Diplodus bellottii</i>        | 15  | 27  | 1672 |
| <i>Lepidopus caudatus</i>        | 25  | 45  | 1669 |
| <i>Atherina presbyter</i>        | 11  | 20  | 1664 |
| <i>Scophthalmus maximus</i>      | 16  | 29  | 1635 |
| <i>Lithognathus mormyrus</i>     | 30  | 56  | 1625 |
| <i>Centrolophus niger</i>        | 36  | 63  | 1617 |
| <i>Xiphias gladius</i>           | 80  | 145 | 1520 |
| <i>Scophthalmus rhombus</i>      | 56  | 104 | 1519 |
| <i>Dipturus nidarosiensis</i>    | 70  | 126 | 1491 |
| <i>Epigonus telescopus</i>       | 9   | 17  | 1490 |
| <i>Blennius ocellaris</i>        | 9   | 17  | 1483 |
| <i>Pagrus pagrus</i>             | 27  | 51  | 1464 |
| <i>Ammodytes</i>                 | 27  | 52  | 1462 |
| <i>Pagellus bellottii</i>        | 15  | 28  | 1426 |
| <i>Echiichthys vipera</i>        | 5   | 9   | 1422 |
| <i>Dicologlossa cuneata</i>      | 20  | 37  | 1399 |
| <i>Spicara maena</i>             | 9   | 17  | 1398 |
| <i>Dasyatis tortonesei</i>       | 62  | 116 | 1352 |
| <i>Dasyatis tortonesei</i>       | 116 | 215 | 1328 |
| <i>Mola mola</i>                 | 66  | 123 | 1296 |
| <i>Dipturus oxyrinchus</i>       | 139 | 238 | 1243 |

|                                  |     |     |      |
|----------------------------------|-----|-----|------|
| <i>Diplodus vulgaris</i>         | 8   | 15  | 1217 |
| <i>Spicara maena</i>             | 17  | 31  | 1208 |
| <i>Pagellus bogaraveo</i>        | 16  | 29  | 1177 |
| <i>Gaidropsarus vulgaris</i>     | 35  | 62  | 1164 |
| <i>Beryx decadactylus</i>        | 26  | 47  | 1149 |
| <i>Engraulis encrasicolus</i>    | 132 | 243 | 1129 |
| <i>Alepocephalus rostratus</i>   | 41  | 74  | 1121 |
| <i>Centrolophus niger</i>        | 63  | 110 | 1056 |
| <i>Gaidropsarus vulgaris</i>     | 19  | 35  | 1016 |
| <i>Tetronarce nobiliana</i>      | 69  | 131 | 1008 |
| <i>Syngnathus acus</i>           | 8   | 14  | 994  |
| <i>Galeus atlanticus</i>         | 15  | 27  | 984  |
| <i>Liparis liparis</i>           | 13  | 23  | 980  |
| <i>Capros aper</i>               | 2   | 4   | 918  |
| <i>Alepocephalus rostratus</i>   | 22  | 41  | 918  |
| <i>Notacanthus bonaparte</i>     | 19  | 34  | 916  |
| <i>Scomber colias</i>            | 33  | 58  | 902  |
| <i>Labrus mixtus</i>             | 18  | 31  | 902  |
| <i>Hippoglossus hippoglossus</i> | 113 | 204 | 880  |
| <i>Brama brama</i>               | 51  | 91  | 868  |
| <i>Sebastes viviparus</i>        | 5   | 8   | 859  |
| <i>Entelurus aequoreus</i>       | 37  | 75  | 843  |
| <i>Anguilla anguilla</i>         | 58  | 105 | 835  |
| <i>Beryx splendens</i>           | 14  | 26  | 833  |
| <i>Dicentrarchus punctatus</i>   | 61  | 105 | 829  |
| <i>Arnoglossus imperialis</i>    | 6   | 11  | 825  |
| <i>Trisopterus minutus</i>       | 3   | 5   | 807  |
| <i>Deania profundorum</i>        | 48  | 86  | 803  |
| <i>Trachyrincus scabrus</i>      | 9   | 16  | 800  |
| <i>Rajella bathyphila</i>        | 126 | 226 | 792  |
| <i>Microstomus kitt</i>          | 5   | 10  | 787  |
| <i>Notacanthus bonaparte</i>     | 34  | 63  | 775  |
| <i>Balistes capriscus</i>        | 16  | 29  | 760  |
| <i>Liparis liparis</i>           | 7   | 13  | 758  |
| <i>Pagellus bogaraveo</i>        | 29  | 53  | 746  |
| <i>Taurulus bubalis</i>          | 16  | 30  | 684  |
| <i>Nezumia aequalis</i>          | 47  | 87  | 664  |
| <i>Taurulus bubalis</i>          | 9   | 16  | 663  |
| <i>Argyrosomus regius</i>        | 67  | 129 | 660  |
| <i>Maurolicus muelleri</i>       | 58  | 94  | 646  |
| <i>Raja undulata</i>             | 22  | 40  | 645  |
| <i>Zeus faber</i>                | 105 | 201 | 639  |
| <i>Malacocephalus laevis</i>     | 199 | 381 | 638  |
| <i>Lepidotrigla cavillone</i>    | 17  | 30  | 630  |
| <i>Serranus cabrilla</i>         | 17  | 33  | 627  |
| <i>Notoscopelus kroyeri</i>      | 118 | 220 | 623  |



|                                  |     |     |     |
|----------------------------------|-----|-----|-----|
| <i>Pagrus pagrus</i>             | 51  | 96  | 614 |
| <i>Labrus bergylta</i>           | 30  | 55  | 598 |
| <i>Tetronarce nobiliana</i>      | 37  | 69  | 580 |
| <i>Molva dypterygia</i>          | 48  | 88  | 573 |
| <i>Gadiculus argenteus</i>       | 3   | 6   | 571 |
| <i>Chelidonichthys lucerna</i>   | 9   | 17  | 568 |
| <i>Trachipterus arcticus</i>     | 111 | 207 | 556 |
| <i>Gasterosteus aculeatus</i>    | 5   | 9   | 556 |
| <i>Scymnodon ringens</i>         | 21  | 39  | 556 |
| <i>Sarda sarda</i>               | 38  | 69  | 554 |
| <i>Sphoeroides pachygaster</i>   | 27  | 51  | 554 |
| <i>Sphoeroides pachygaster</i>   | 14  | 27  | 553 |
| <i>Boops boops</i>               | 5   | 10  | 542 |
| <i>Bathysolea profundicola</i>   | 12  | 21  | 542 |
| <i>Cyclopterus lumpus</i>        | 11  | 20  | 540 |
| <i>Anthias anthias</i>           | 10  | 20  | 528 |
| <i>Schedophilus medusophagus</i> | 27  | 49  | 527 |
| <i>Nemichthys scolopaceus</i>    | 66  | 123 | 517 |
| <i>Schedophilus medusophagus</i> | 49  | 92  | 513 |
| <i>Alosa fallax</i>              | 11  | 21  | 503 |
| <i>Lumpenus lampraeformis</i>    | 8   | 21  | 495 |
| <i>Pegusa lascaris</i>           | 18  | 32  | 492 |
| <i>Sparus aurata</i>             | 56  | 104 | 490 |
| <i>Leucoraja circularis</i>      | 142 | 255 | 481 |
| <i>Scyliorhinus canicula</i>     | 88  | 157 | 478 |
| <i>Xiphias gladius</i>           | 145 | 262 | 471 |
| <i>Lithognathus mormyrus</i>     | 16  | 30  | 461 |
| <i>Molva dypterygia</i>          | 88  | 159 | 441 |
| <i>Engraulis encrasicolus</i>    | 3   | 6   | 440 |
| <i>Chelon labrosus</i>           | 56  | 101 | 436 |
| <i>Zeugopterus norvegicus</i>    | 8   | 14  | 431 |
| <i>Scymnodon ringens</i>         | 128 | 234 | 428 |
| <i>Squalus blainville</i>        | 45  | 84  | 423 |
| <i>Leucoraja fullonica</i>       | 25  | 46  | 419 |
| <i>Molva dypterygia</i>          | 27  | 48  | 415 |
| <i>Heptranchias perlo</i>        | 73  | 133 | 413 |
| <i>Microchirus variegatus</i>    | 5   | 10  | 396 |
| <i>Deania calcea</i>             | 28  | 49  | 395 |
| <i>Scyliorhinus canicula</i>     | 9   | 15  | 395 |
| <i>Centrophorus granulosus</i>   | 76  | 136 | 388 |
| <i>Myoxocephalus scorpius</i>    | 28  | 53  | 387 |
| <i>Diplodus sargus</i>           | 30  | 54  | 369 |
| <i>Syngnathus acus</i>           | 25  | 46  | 362 |
| <i>Alopias vulpinus</i>          | 157 | 303 | 355 |
| <i>Argyrosomus regius</i>        | 9   | 18  | 351 |
| <i>Enchelyopus cimbrius</i>      | 7   | 13  | 346 |

|                                     |     |     |     |
|-------------------------------------|-----|-----|-----|
| <i>Mullus surmuletus</i>            | 5   | 9   | 343 |
| <i>Xenodermichthys copei</i>        | 11  | 21  | 337 |
| <i>Argentina sphyraena</i>          | 3   | 6   | 337 |
| <i>Citharus linguatula</i>          | 20  | 37  | 332 |
| <i>Epigonus telescopus</i>          | 32  | 61  | 327 |
| <i>Deania profundorum</i>           | 86  | 153 | 327 |
| <i>Coryphaenoides rupestris</i>     | 90  | 162 | 327 |
| <i>Leucoraja circularis</i>         | 24  | 44  | 327 |
| <i>Hippoglossoides platessoides</i> | 3   | 6   | 324 |
| <i>Dicentrarchus punctatus</i>      | 35  | 61  | 321 |
| <i>Leucoraja naevus</i>             | 13  | 23  | 320 |
| <i>Mustelus mustelus</i>            | 23  | 46  | 316 |
| <i>Myliobatis aquila</i>            | 82  | 175 | 314 |
| <i>Nezumia aequalis</i>             | 4   | 7   | 309 |
| <i>Polyprion americanus</i>         | 53  | 100 | 305 |
| <i>Scomber scombrus</i>             | 64  | 117 | 300 |
| <i>Sarpa salpa</i>                  | 29  | 54  | 298 |
| <i>Dipturus oxyrinchus</i>          | 47  | 81  | 296 |
| <i>Acantholabrus palloni</i>        | 16  | 30  | 295 |
| <i>Notoscopelus kroyeri</i>         | 10  | 18  | 286 |
| <i>Rajella bathyphila</i>           | 70  | 126 | 285 |
| <i>Pholis gunnellus</i>             | 13  | 24  | 282 |
| <i>Hydrolagus mirabilis</i>         | 44  | 79  | 280 |
| <i>Trachipterus arcticus</i>        | 60  | 111 | 275 |
| <i>Lophius budegassa</i>            | 5   | 9   | 267 |
| <i>Nesiarchus nasutus</i>           | 73  | 134 | 267 |
| <i>Gaidropsarus vulgaris</i>        | 11  | 19  | 262 |
| <i>Pomatoschistus minutus</i>       | 3   | 6   | 258 |
| <i>Stomias boa</i>                  | 25  | 45  | 256 |
| <i>Agonus cataphractus</i>          | 18  | 36  | 253 |
| <i>Scorpaena loppei</i>             | 8   | 14  | 248 |
| <i>Rostroraja alba</i>              | 73  | 134 | 244 |
| <i>Amblyraja radiata</i>            | 6   | 11  | 242 |
| <i>Umbrina canariensis</i>          | 31  | 56  | 241 |
| <i>Sebastes viviparus</i>           | 28  | 50  | 241 |
| <i>Serranus cabrilla</i>            | 9   | 17  | 239 |
| <i>Raja clavata</i>                 | 138 | 248 | 239 |
| <i>Pagellus bogaraveo</i>           | 9   | 16  | 239 |
| <i>Halargyreus johnsonii</i>        | 12  | 22  | 234 |
| <i>Dipturus batis</i>               | 16  | 30  | 232 |
| <i>Raja miraletus</i>               | 26  | 46  | 230 |
| <i>Diplodus annularis</i>           | 15  | 27  | 229 |
| <i>Synaphobranchus kaupii</i>       | 22  | 38  | 227 |
| <i>Torpedo torpedo</i>              | 56  | 110 | 223 |
| <i>Callanthias ruber</i>            | 9   | 17  | 223 |
| <i>Aphia minuta</i>                 | 3   | 5   | 222 |

|                                |     |     |     |
|--------------------------------|-----|-----|-----|
| <i>Trachurus trachurus</i>     | 3   | 5   | 219 |
| <i>Rostroraja alba</i>         | 134 | 248 | 219 |
| <i>Mora moro</i>               | 61  | 110 | 218 |
| <i>Acipenser sturio</i>        | 80  | 148 | 218 |
| <i>Chimaera monstrosa</i>      | 9   | 16  | 216 |
| <i>Torpedo marmorata</i>       | 14  | 27  | 207 |
| <i>Torpedo marmorata</i>       | 51  | 98  | 207 |
| <i>Alosa alosa</i>             | 19  | 34  | 207 |
| <i>Echiichthys vipera</i>      | 17  | 31  | 204 |
| <i>Citharus linguatula</i>     | 6   | 11  | 202 |
| <i>Labrus bergylta</i>         | 17  | 30  | 201 |
| <i>Raja asterias</i>           | 39  | 69  | 200 |
| <i>Maurolicus muelleri</i>     | 3   | 5   | 196 |
| <i>Phycis phycis</i>           | 33  | 59  | 193 |
| <i>Pollachius virens</i>       | 10  | 19  | 190 |
| <i>Lycodes vahlii</i>          | 18  | 32  | 189 |
| <i>Maurolicus muelleri</i>     | 5   | 9   | 185 |
| <i>Pagellus bellottii</i>      | 8   | 15  | 179 |
| <i>Lycodes vahlii</i>          | 10  | 18  | 174 |
| <i>Solea senegalensis</i>      | 18  | 34  | 173 |
| <i>Pagellus erythrinus</i>     | 8   | 15  | 172 |
| <i>Leucoraja naevus</i>        | 73  | 130 | 167 |
| <i>Argentina silus</i>         | 6   | 11  | 166 |
| <i>Alepocephalus bairdii</i>   | 40  | 72  | 165 |
| <i>Argentina sphyraena</i>     | 38  | 69  | 162 |
| <i>Acantholabrus palloni</i>   | 9   | 16  | 159 |
| <i>Stomias boa</i>             | 14  | 25  | 158 |
| <i>Anguilla anguilla</i>       | 32  | 58  | 154 |
| <i>Raja miraletus</i>          | 46  | 82  | 153 |
| <i>Dicentrarchus punctatus</i> | 21  | 35  | 152 |
| <i>Pagrus auriga</i>           | 27  | 52  | 151 |
| <i>Brosme brosme</i>           | 19  | 34  | 149 |
| <i>Xenodermichthys copei</i>   | 6   | 11  | 149 |
| <i>Limanda limanda</i>         | 3   | 6   | 147 |
| <i>Alosa alosa</i>             | 34  | 61  | 147 |
| <i>Taurulus bubalis</i>        | 5   | 9   | 146 |
| <i>Symphodus roissali</i>      | 28  | 52  | 145 |
| <i>Pomadasys incisus</i>       | 16  | 31  | 144 |
| <i>Alosa fallax</i>            | 6   | 11  | 144 |
| <i>Aphanopus carbo</i>         | 39  | 69  | 144 |
| <i>Cyttopsis rosea</i>         | 14  | 27  | 143 |
| <i>Arnoglossus laterna</i>     | 4   | 7   | 143 |
| <i>Nesiarchus nasutus</i>      | 40  | 73  | 142 |
| <i>Sprattus sprattus</i>       | 71  | 130 | 141 |
| <i>Umbrina canariensis</i>     | 9   | 17  | 140 |
| <i>Cepola macrophthalma</i>    | 8   | 21  | 138 |

|                                |     |     |     |
|--------------------------------|-----|-----|-----|
| <i>Diplodus annularis</i>      | 8   | 15  | 138 |
| <i>Belone belone</i>           | 61  | 110 | 135 |
| <i>Raja montagui</i>           | 12  | 21  | 133 |
| <i>Diplodus cervinus</i>       | 28  | 50  | 132 |
| <i>Raja microocellata</i>      | 20  | 37  | 132 |
| <i>Pagrus pagrus</i>           | 15  | 27  | 130 |
| <i>Galeorhinus galeus</i>      | 23  | 44  | 129 |
| <i>Polymetme thaeocoryla</i>   | 12  | 22  | 128 |
| <i>Mora moro</i>               | 11  | 19  | 127 |
| <i>Echiodon drummondii</i>     | 18  | 41  | 124 |
| <i>Ephippion guttifer</i>      | 27  | 51  | 121 |
| <i>Galeus melastomus</i>       | 8   | 14  | 120 |
| <i>Blennius ocellaris</i>      | 17  | 32  | 120 |
| <i>Gobius niger</i>            | 5   | 9   | 119 |
| <i>Lepidion eques</i>          | 39  | 66  | 119 |
| <i>Etmopterus spinax</i>       | 7   | 13  | 115 |
| <i>Halargyreus johnsonii</i>   | 7   | 12  | 114 |
| <i>Solea solea</i>             | 6   | 10  | 113 |
| <i>Dentex canariensis</i>      | 28  | 53  | 111 |
| <i>Sardinella aurita</i>       | 19  | 36  | 109 |
| <i>Malacocephalus laevis</i>   | 8   | 15  | 109 |
| <i>Rostroraja alba</i>         | 40  | 73  | 108 |
| <i>Galeus atlanticus</i>       | 50  | 93  | 108 |
| <i>Scorpaena loppei</i>        | 25  | 45  | 106 |
| <i>Synchiropus phaeton</i>     | 13  | 28  | 102 |
| <i>Dasyatis tortonesei</i>     | 34  | 62  | 101 |
| <i>Merluccius merluccius</i>   | 3   | 6   | 101 |
| <i>Alepocephalus bairdii</i>   | 22  | 40  | 100 |
| <i>Liparis montagui</i>        | 8   | 16  | 96  |
| <i>Malacocephalus laevis</i>   | 103 | 199 | 94  |
| <i>Dalatias licha</i>          | 22  | 41  | 94  |
| <i>Malacocephalus laevis</i>   | 4   | 8   | 93  |
| <i>Beryx decadactylus</i>      | 14  | 26  | 88  |
| <i>Microchirus boscanion</i>   | 9   | 17  | 85  |
| <i>Ctenolabrus rupestris</i>   | 10  | 18  | 83  |
| <i>Belone belone</i>           | 34  | 61  | 82  |
| <i>Arnoglossus thori</i>       | 10  | 18  | 81  |
| <i>Beryx decadactylus</i>      | 47  | 85  | 80  |
| <i>Engraulis encrasicolus</i>  | 21  | 39  | 80  |
| <i>Zeugopterus punctatus</i>   | 8   | 14  | 80  |
| <i>Molva molva</i>             | 12  | 23  | 78  |
| <i>Callionymus reticulatus</i> | 6   | 12  | 78  |
| <i>Molva dypterygia</i>        | 15  | 27  | 77  |
| <i>Pagrus auriga</i>           | 52  | 98  | 77  |
| <i>Labrus mixtus</i>           | 31  | 55  | 77  |
| <i>Microchirus boscanion</i>   | 5   | 9   | 74  |

|                                  |    |     |    |
|----------------------------------|----|-----|----|
| <i>Serranus hepatus</i>          | 4  | 8   | 74 |
| <i>Microchirus azevia</i>        | 17 | 31  | 72 |
| <i>Gaidropsarus vulgaris</i>     | 3  | 6   | 71 |
| <i>Myxine glutinosa</i>          | 36 | 63  | 69 |
| <i>Lepidopus caudatus</i>        | 82 | 150 | 68 |
| <i>Nezumia aequalis</i>          | 7  | 13  | 67 |
| <i>Callionymus maculatus</i>     | 3  | 5   | 66 |
| <i>Gadiculus argenteus</i>       | 18 | 32  | 66 |
| <i>Polymetme corythaeola</i>     | 13 | 23  | 65 |
| <i>Myxine glutinosa</i>          | 12 | 21  | 65 |
| <i>Buglossidium luteum</i>       | 16 | 29  | 65 |
| <i>Phycis phycis</i>             | 18 | 33  | 65 |
| <i>Hyperoplus lanceolatus</i>    | 8  | 15  | 65 |
| <i>Lycodes gracilis</i>          | 11 | 26  | 63 |
| <i>Maurolicus muelleri</i>       | 2  | 3   | 63 |
| <i>Helicolenus dactylopterus</i> | 52 | 94  | 63 |
| <i>Osmerus eperlanus</i>         | 6  | 11  | 61 |
| <i>Zoarces viviparus</i>         | 12 | 23  | 61 |
| <i>Synaphobranchus kaupii</i>    | 12 | 22  | 61 |
| <i>Zeugopterus norvegicus</i>    | 4  | 8   | 61 |
| <i>Arnoglossus rueppelii</i>     | 12 | 22  | 57 |
| <i>Trachyrincus scabrus</i>      | 49 | 88  | 56 |
| <i>Arctozenus risso</i>          | 13 | 24  | 56 |
| <i>Oxynotus paradoxus</i>        | 73 | 133 | 55 |
| <i>Stomias boa</i>               | 82 | 147 | 55 |
| <i>Atherina presbyter</i>        | 3  | 6   | 55 |
| <i>Lampanyctus crocodilus</i>    | 12 | 23  | 52 |
| <i>Hygophum benoiti</i>          | 30 | 54  | 51 |
| <i>Pholis gunnellus</i>          | 24 | 44  | 51 |
| <i>Ciliata mustela</i>           | 7  | 13  | 50 |
| <i>Anthias anthias</i>           | 20 | 41  | 50 |
| <i>Caranx rhonchus</i>           | 8  | 17  | 50 |
| <i>Galeus murinus</i>            | 43 | 79  | 49 |
| <i>Pegusa lascaris</i>           | 10 | 18  | 49 |
| <i>Myoxocephalus scorpius</i>    | 5  | 8   | 49 |
| <i>Umbrina cirrosa</i>           | 31 | 58  | 49 |
| <i>Sardina pilchardus</i>        | 35 | 64  | 48 |
| <i>Oxynotus paradoxus</i>        | 40 | 73  | 48 |
| <i>Mugil cephalus</i>            | 31 | 59  | 48 |
| <i>Arnoglossus imperialis</i>    | 19 | 35  | 48 |
| <i>Gobius niger</i>              | 9  | 17  | 46 |
| <i>Ciliata mustela</i>           | 23 | 41  | 46 |
| <i>Deania profundorum</i>        | 27 | 48  | 46 |
| <i>Hyperoplus lanceolatus</i>    | 4  | 8   | 46 |
| <i>Alosa agone</i>               | 17 | 33  | 45 |
| <i>Dicologlossa cuneata</i>      | 6  | 11  | 45 |

|                                   |    |     |    |
|-----------------------------------|----|-----|----|
| <i>Squalus blainville</i>         | 25 | 45  | 44 |
| <i>Alepocephalus rostratus</i>    | 12 | 22  | 43 |
| <i>Callionymus maculatus</i>      | 21 | 41  | 42 |
| <i>Symphodus bailloni</i>         | 15 | 28  | 41 |
| <i>Labrus mixtus</i>              | 10 | 18  | 41 |
| <i>Rajella bathyphila</i>         | 39 | 70  | 41 |
| <i>Microchirus theophila</i>      | 17 | 32  | 40 |
| <i>Sphyræna sphyræna</i>          | 36 | 69  | 39 |
| <i>Sprattus sprattus</i>          | 21 | 38  | 38 |
| <i>Uranoscopus scaber</i>         | 29 | 53  | 38 |
| <i>Ephippion guttifer</i>         | 14 | 27  | 37 |
| <i>Dipturus nidarosiensis</i>     | 39 | 70  | 37 |
| <i>Trachyrincus scabrus</i>       | 28 | 49  | 37 |
| <i>Syngnathus acus</i>            | 14 | 25  | 36 |
| <i>Citharus linguatula</i>        | 3  | 6   | 36 |
| <i>Alosa alosa</i>                | 11 | 19  | 36 |
| <i>Raja asterias</i>              | 69 | 123 | 35 |
| <i>Coryphaenoides rupestris</i>   | 27 | 50  | 35 |
| <i>Lepidion eques</i>             | 8  | 14  | 35 |
| <i>Pollachius pollachius</i>      | 11 | 19  | 35 |
| <i>Molva macrophthalma</i>        | 10 | 17  | 34 |
| <i>Lampanyctus crocodilus</i>     | 7  | 12  | 34 |
| <i>Halargyreus johnsonii</i>      | 22 | 40  | 34 |
| <i>Scyliorhinus stellaris</i>     | 13 | 24  | 33 |
| <i>Pomadasys incisus</i>          | 8  | 16  | 33 |
| <i>Cyttopsis rosea</i>            | 8  | 14  | 33 |
| <i>Lepidotrigla dieuzeidei</i>    | 17 | 31  | 33 |
| <i>Pagrus pagrus</i>              | 8  | 15  | 31 |
| <i>Lepidotrigla dieuzeidei</i>    | 5  | 9   | 31 |
| <i>Callionymus reticulatus</i>    | 12 | 26  | 31 |
| <i>Trigla lyra</i>                | 5  | 10  | 30 |
| <i>Coryphaenoides rupestris</i>   | 50 | 90  | 29 |
| <i>Myliobatis aquila</i>          | 18 | 38  | 29 |
| <i>Syngnathus rostellatus</i>     | 9  | 15  | 29 |
| <i>Pomatoschistus minutus</i>     | 33 | 58  | 28 |
| <i>Bathysolea profundicola</i>    | 21 | 39  | 28 |
| <i>Callanthias ruber</i>          | 5  | 9   | 28 |
| <i>Spicara smarís</i>             | 10 | 18  | 27 |
| <i>Maurolicus muelleri</i>        | 9  | 14  | 27 |
| <i>Glyptocephalus cynoglossus</i> | 7  | 13  | 27 |
| <i>Echiodon dentatus</i>          | 20 | 36  | 26 |
| <i>Spicara maena</i>              | 5  | 9   | 26 |
| <i>Scomber scombrus</i>           | 6  | 11  | 26 |
| <i>Liparis liparis</i>            | 4  | 7   | 26 |
| <i>Gnathophis mystax</i>          | 20 | 36  | 26 |
| <i>Ruvettus pretiosus</i>         | 77 | 140 | 26 |

|                                  |    |     |    |
|----------------------------------|----|-----|----|
| <i>Pagellus acarne</i>           | 5  | 9   | 25 |
| <i>Aphia minuta</i>              | 5  | 8   | 25 |
| <i>Myoxocephalus scorpioides</i> | 18 | 32  | 25 |
| <i>Gaidropsarus vulgaris</i>     | 6  | 11  | 24 |
| <i>Trachinus draco</i>           | 6  | 11  | 24 |
| <i>Chaunax pictus</i>            | 14 | 27  | 24 |
| <i>Myctophum punctatum</i>       | 6  | 10  | 24 |
| <i>Hymenocephalus italicus</i>   | 13 | 24  | 24 |
| <i>Galeus melastomus</i>         | 96 | 181 | 24 |
| <i>Galeus murinus</i>            | 24 | 43  | 24 |
| <i>Diplodus sargus</i>           | 16 | 30  | 23 |
| <i>Raja brachyura</i>            | 12 | 22  | 23 |
| <i>Dentex gibbosus</i>           | 31 | 57  | 22 |
| <i>Dipturus oxyrinchus</i>       | 28 | 47  | 22 |
| <i>Petromyzon marinus</i>        | 63 | 109 | 22 |
| <i>Scorpaena scrofa</i>          | 8  | 15  | 21 |
| <i>Liparis montagui</i>          | 4  | 8   | 21 |
| <i>Solea senegalensis</i>        | 34 | 62  | 21 |
| <i>Chaunax pictus</i>            | 27 | 49  | 21 |
| <i>Monochirus hispidus</i>       | 8  | 14  | 20 |
| <i>Lepidorhombus boschii</i>     | 3  | 6   | 20 |
| <i>Hymenocephalus italicus</i>   | 24 | 43  | 20 |
| <i>Pagellus erythrinus</i>       | 4  | 8   | 18 |
| <i>Dasyatis pastinaca</i>        | 18 | 34  | 18 |
| <i>Hyperoplus lanceolatus</i>    | 53 | 101 | 18 |
| <i>Syngnathus acus</i>           | 4  | 8   | 18 |
| <i>Arnoglossus thori</i>         | 5  | 10  | 17 |
| <i>Ciliata septentrionalis</i>   | 9  | 16  | 17 |
| <i>Cyttopsis rosea</i>           | 27 | 49  | 17 |
| <i>Symphurus nigrescens</i>      | 6  | 11  | 17 |
| <i>Nerophis ophidion</i>         | 25 | 50  | 17 |
| <i>Gasterosteus aculeatus</i>    | 9  | 17  | 17 |
| <i>Alosa agone</i>               | 33 | 62  | 17 |
| <i>Micromesistius poutassou</i>  | 4  | 6   | 17 |
| <i>Raja clavata</i>              | 7  | 13  | 17 |
| <i>Nemichthys scolopaceus</i>    | 36 | 66  | 17 |
| <i>Dentex maroccanus</i>         | 15 | 29  | 17 |
| <i>Scorpaena loppei</i>          | 14 | 25  | 17 |
| <i>Polymetme thaeocoryla</i>     | 22 | 40  | 17 |
| <i>Phycis blennoides</i>         | 6  | 11  | 16 |
| <i>Blennius ocellaris</i>        | 4  | 9   | 16 |
| <i>Leucoraja circularis</i>      | 13 | 24  | 16 |
| <i>Uranoscopus scaber</i>        | 16 | 29  | 16 |
| <i>Trachyrincus scabrus</i>      | 5  | 9   | 16 |
| <i>Pterycombus brama</i>         | 28 | 53  | 16 |
| <i>Salmo salar</i>               | 32 | 59  | 16 |

|                                     |    |     |    |
|-------------------------------------|----|-----|----|
| <i>Dipturus nidarosiensis</i>       | 22 | 39  | 16 |
| <i>Benthodesmus simonyi</i>         | 60 | 104 | 16 |
| <i>Chelidonichthys lastoviza</i>    | 18 | 33  | 15 |
| <i>Hydrolagus mirabilis</i>         | 13 | 24  | 15 |
| <i>Labrus bergylta</i>              | 9  | 17  | 15 |
| <i>Dentex gibbosus</i>              | 17 | 31  | 14 |
| <i>Dentex canariensis</i>           | 15 | 28  | 14 |
| <i>Chelidonichthys lastoviza</i>    | 10 | 18  | 14 |
| <i>Microchirus theophila</i>        | 9  | 17  | 14 |
| <i>Naucrates ductor</i>             | 28 | 53  | 14 |
| <i>Eutrigla gurnardus</i>           | 3  | 5   | 14 |
| <i>Rajella bathyphila</i>           | 22 | 39  | 13 |
| <i>Raja undulata</i>                | 12 | 22  | 13 |
| <i>Ciliata septentrionalis</i>      | 5  | 9   | 13 |
| <i>Stromateus fiatola</i>           | 27 | 50  | 13 |
| <i>Chlorophthalmus agassizi</i>     | 11 | 22  | 13 |
| <i>Scorpaena scrofa</i>             | 15 | 27  | 13 |
| <i>Centrolabrus exoletus</i>        | 19 | 33  | 13 |
| <i>Buglossidium luteum</i>          | 3  | 5   | 13 |
| <i>Helicolenus dactylopterus</i>    | 3  | 5   | 13 |
| <i>Deania calcea</i>                | 16 | 28  | 13 |
| <i>Rajella fyllae</i>               | 43 | 80  | 12 |
| <i>Trachipterus trachipterus</i>    | 66 | 123 | 12 |
| <i>Trachipterus arcticus</i>        | 32 | 60  | 12 |
| <i>Chauliodus sloani</i>            | 18 | 33  | 12 |
| <i>Monochirus hispidus</i>          | 14 | 25  | 12 |
| <i>Lophius piscatorius</i>          | 4  | 8   | 12 |
| <i>Stomias boa</i>                  | 8  | 14  | 12 |
| <i>Coryphaenoides rupestris</i>     | 15 | 27  | 12 |
| <i>Chelidonichthys lucerna</i>      | 5  | 9   | 12 |
| <i>Ciliata septentrionalis</i>      | 16 | 29  | 11 |
| <i>Plectorhinchus mediterraneus</i> | 30 | 54  | 11 |
| <i>Chelidonichthys obscurus</i>     | 35 | 62  | 11 |
| <i>Cyclopterus lumpus</i>           | 6  | 11  | 11 |
| <i>Spratelloides lewisi</i>         | 11 | 20  | 11 |
| <i>Dentex maroccanus</i>            | 29 | 56  | 11 |
| <i>Notoscopelus kroyeri</i>         | 5  | 10  | 11 |
| <i>Macrourus berglax</i>            | 18 | 35  | 11 |
| <i>Zeugopterus punctatus</i>        | 14 | 26  | 11 |
| <i>Pegusa lascaris</i>              | 5  | 10  | 10 |
| <i>Osmerus eperlanus</i>            | 11 | 20  | 10 |
| <i>Hoplostethus mediterraneus</i>   | 4  | 8   | 10 |
| <i>Sarpa salpa</i>                  | 16 | 29  | 10 |
| <i>Pholis gunnellus</i>             | 7  | 13  | 10 |
| <i>Lycenchelys sarsii</i>           | 10 | 16  | 10 |
| <i>Dentex gibbosus</i>              | 9  | 17  | 9  |



|                                   |    |    |   |
|-----------------------------------|----|----|---|
| <i>Gaidropsarus biscayensis</i>   | 7  | 12 | 9 |
| <i>Torpedo marmorata</i>          | 7  | 14 | 9 |
| <i>Symphurus nigrescens</i>       | 11 | 19 | 9 |
| <i>Gaidropsarus mediterraneus</i> | 23 | 42 | 9 |
| <i>Mustelus asterias</i>          | 15 | 28 | 9 |
| <i>Macrourus berglax</i>          | 35 | 65 | 9 |
| <i>Triglops murrayi</i>           | 9  | 19 | 9 |
| <i>Raja montagui</i>              | 7  | 12 | 8 |
| <i>Lepidopus caudatus</i>         | 14 | 25 | 8 |
| <i>Alosa agone</i>                | 9  | 17 | 8 |
| <i>Synaphobranchus kaupii</i>     | 38 | 66 | 8 |
| <i>Ophidion barbatum</i>          | 23 | 42 | 8 |
| <i>Sardina pilchardus</i>         | 3  | 6  | 8 |
| <i>Hygophum benoiti</i>           | 16 | 30 | 8 |
| <i>Petromyzon marinus</i>         | 21 | 36 | 8 |
| <i>Arctozenus risso</i>           | 24 | 44 | 7 |
| <i>Brama brama</i>                | 16 | 29 | 7 |
| <i>Coryphaenoides rupestris</i>   | 8  | 15 | 7 |
| <i>Zenopsis conchifer</i>         | 11 | 19 | 7 |
| <i>Melanostomias bartonbeani</i>  | 22 | 40 | 7 |
| <i>Entelurus aequoreus</i>        | 9  | 18 | 7 |
| <i>Agonus cataphractus</i>        | 2  | 5  | 7 |
| <i>Spicara smaris</i>             | 18 | 35 | 7 |
| <i>Parablennius gattorugine</i>   | 9  | 17 | 7 |
| <i>Coelorinchus caelorhincus</i>  | 2  | 4  | 7 |
| <i>Arctozenus risso</i>           | 7  | 13 | 7 |
| <i>Zeugopterus punctatus</i>      | 4  | 8  | 7 |
| <i>Umbrina canariensis</i>        | 5  | 9  | 7 |
| <i>Centrolophus niger</i>         | 21 | 36 | 7 |
| <i>Synaphobranchus kaupii</i>     | 7  | 12 | 7 |
| <i>Arnoglossus rueppelii</i>      | 6  | 12 | 6 |
| <i>Ctenolabrus rupestris</i>      | 5  | 10 | 6 |
| <i>Zeugopterus regius</i>         | 8  | 14 | 6 |
| <i>Zoarces viviparus</i>          | 23 | 43 | 6 |
| <i>Arnoglossus laterna</i>        | 20 | 34 | 6 |
| <i>Echiichthys vipera</i>         | 31 | 58 | 6 |
| <i>Raniceps raninus</i>           | 17 | 29 | 6 |
| <i>Nezumia aequalis</i>           | 2  | 4  | 6 |
| <i>Maurolicus muelleri</i>        | 14 | 23 | 6 |
| <i>Argyrosomus regius</i>         | 5  | 9  | 6 |
| <i>Schedophilus medusophagus</i>  | 14 | 27 | 6 |
| <i>Gaidropsarus mediterraneus</i> | 12 | 23 | 6 |
| <i>Clupea harengus</i>            | 2  | 3  | 6 |
| <i>Benthodesmus elongatus</i>     | 35 | 60 | 6 |
| <i>Trisopterus minutus</i>        | 32 | 59 | 6 |
| <i>Leucoraja fullonica</i>        | 14 | 25 | 6 |

|                                    |    |     |   |
|------------------------------------|----|-----|---|
| <i>Zenopsis conchifer</i>          | 6  | 11  | 6 |
| <i>Epigonus denticulatus</i>       | 6  | 10  | 5 |
| <i>Triglops murrayi</i>            | 5  | 9   | 5 |
| <i>Diaphus dumerilii</i>           | 6  | 11  | 5 |
| <i>Callionymus maculatus</i>       | 41 | 81  | 5 |
| <i>Glyptocephalus cynoglossus</i>  | 4  | 7   | 5 |
| <i>Gaidropsarus biscayensis</i>    | 12 | 22  | 5 |
| <i>Nessorhamphus ingolfianus</i>   | 36 | 66  | 5 |
| <i>Argyropelecus olfersii</i>      | 4  | 8   | 5 |
| <i>Ophidion barbatum</i>           | 13 | 23  | 5 |
| <i>Leucoraja naevus</i>            | 7  | 13  | 5 |
| <i>Serranus scriba</i>             | 16 | 30  | 5 |
| <i>Etmopterus pusillus</i>         | 24 | 44  | 5 |
| <i>Raja miraletus</i>              | 14 | 26  | 5 |
| <i>Anthias anthias</i>             | 5  | 10  | 5 |
| <i>Sigmops bathyphilus</i>         | 24 | 43  | 5 |
| <i>Microstomus kitt</i>            | 3  | 5   | 5 |
| <i>Gaidropsarus macrophthalmus</i> | 22 | 42  | 5 |
| <i>Capros aper</i>                 | 1  | 2   | 5 |
| <i>Spinachia spinachia</i>         | 30 | 57  | 5 |
| <i>Halobatrachus didactylus</i>    | 28 | 51  | 5 |
| <i>Conger conger</i>               | 12 | 21  | 5 |
| <i>Gnathophis mystax</i>           | 36 | 67  | 5 |
| <i>Scorpaena loppei</i>            | 5  | 8   | 5 |
| <i>Syngnathus acus</i>             | 46 | 82  | 4 |
| <i>Petromyzon marinus</i>          | 36 | 63  | 4 |
| <i>Gadella maraldi</i>             | 20 | 35  | 4 |
| <i>Lepidorhombus whiffiagonis</i>  | 3  | 6   | 4 |
| <i>Macrourus berglax</i>           | 10 | 18  | 4 |
| <i>Lampetra fluviatilis</i>        | 18 | 32  | 4 |
| <i>Symphodus bailloni</i>          | 8  | 15  | 4 |
| <i>Serranus hepatus</i>            | 15 | 28  | 4 |
| <i>Lycenchelys sarsii</i>          | 16 | 26  | 4 |
| <i>Raniceps raninus</i>            | 9  | 17  | 4 |
| <i>Pomatoschistus minutus</i>      | 10 | 18  | 4 |
| <i>Magnisudis atlantica</i>        | 13 | 24  | 4 |
| <i>Benthodesmus elongatus</i>      | 60 | 104 | 4 |
| <i>Naucrates ductor</i>            | 15 | 28  | 4 |
| <i>Spinachia spinachia</i>         | 16 | 30  | 4 |
| <i>Argyropelecus olfersii</i>      | 8  | 15  | 4 |
| <i>Lampetra fluviatilis</i>        | 32 | 58  | 4 |
| <i>Microchirus azevia</i>          | 9  | 17  | 4 |
| <i>Chelon labrosus</i>             | 17 | 31  | 3 |
| <i>Chimaera monstrosa</i>          | 5  | 9   | 3 |
| <i>Symphodus melops</i>            | 9  | 17  | 3 |
| <i>Zoarces viviparus</i>           | 7  | 12  | 3 |

|                                  |    |    |   |
|----------------------------------|----|----|---|
| <i>Paraliparis membranaceus</i>  | 9  | 17 | 3 |
| <i>Pontinus kuhlii</i>           | 16 | 30 | 3 |
| <i>Trachurus picturatus</i>      | 5  | 9  | 3 |
| <i>Myoxocephalus scorpioides</i> | 10 | 18 | 3 |
| <i>Mora moro</i>                 | 6  | 11 | 3 |
| <i>Caranx rhonchus</i>           | 17 | 32 | 3 |
| <i>Argentina silus</i>           | 3  | 6  | 3 |
| <i>Belone belone</i>             | 19 | 34 | 3 |
| <i>Synchiropus phaeton</i>       | 6  | 13 | 3 |
| <i>Serrivomer beanii</i>         | 36 | 66 | 3 |
| <i>Gaidropsarus argentatus</i>   | 21 | 39 | 3 |
| <i>Sphoeroides pachygaster</i>   | 7  | 14 | 3 |
| <i>Labrus mixtus</i>             | 6  | 10 | 3 |
| <i>Microchirus ocellatus</i>     | 9  | 16 | 3 |
| <i>Myctophum punctatum</i>       | 3  | 6  | 3 |
| <i>Anguilla anguilla</i>         | 18 | 32 | 3 |
| <i>Boops boops</i>               | 3  | 5  | 3 |
| <i>Notacanthus bonaparte</i>     | 10 | 19 | 3 |
| <i>Sigmops bathyphilus</i>       | 13 | 24 | 3 |
| <i>Scorpaena porcus</i>          | 8  | 15 | 3 |
| <i>Callionymus lyra</i>          | 2  | 5  | 3 |
| <i>Gadella maraldi</i>           | 11 | 20 | 3 |
| <i>Polymetme corythaeola</i>     | 7  | 13 | 2 |
| <i>Epigonus denticulatus</i>     | 10 | 18 | 2 |
| <i>Alosa alosa</i>               | 6  | 11 | 2 |
| <i>Trachurus mediterraneus</i>   | 3  | 5  | 2 |
| <i>Echiodon drummondii</i>       | 8  | 18 | 2 |
| <i>Paraliparis membranaceus</i>  | 5  | 9  | 2 |
| <i>Symphodus roissali</i>        | 15 | 28 | 2 |
| <i>Callionymus reticulatus</i>   | 3  | 6  | 2 |
| <i>Macroramphosus scolopax</i>   | 3  | 6  | 2 |
| <i>Pomatoschistus minutus</i>    | 2  | 3  | 2 |
| <i>Bathysolea profundicola</i>   | 7  | 12 | 2 |
| <i>Centrolabrus exoletus</i>     | 10 | 19 | 2 |
| <i>Pomadasys incisus</i>         | 4  | 8  | 2 |
| <i>Spinachia spinachia</i>       | 5  | 9  | 2 |
| <i>Diplodus vulgaris</i>         | 5  | 8  | 2 |
| <i>Lycodes vahlii</i>            | 5  | 10 | 2 |
| <i>Zeus faber</i>                | 2  | 4  | 2 |
| <i>Pagellus bellottii</i>        | 4  | 8  | 2 |
| <i>Chauliodus sloani</i>         | 10 | 18 | 2 |
| <i>Buglossidium luteum</i>       | 2  | 3  | 2 |
| <i>Arnoglossus thori</i>         | 18 | 33 | 2 |
| <i>Spratelloides lewisi</i>      | 6  | 11 | 2 |
| <i>Melanonus zugmayeri</i>       | 12 | 22 | 2 |
| <i>Neoraja iberica</i>           | 12 | 22 | 2 |

|                                  |    |    |   |
|----------------------------------|----|----|---|
| <i>Chelidonichthys obscurus</i>  | 6  | 11 | 2 |
| <i>Hygophum benoiti</i>          | 9  | 16 | 2 |
| <i>Callanthias ruber</i>         | 17 | 31 | 2 |
| <i>Serranus scriba</i>           | 9  | 16 | 2 |
| <i>Echiodon dentatus</i>         | 11 | 20 | 2 |
| <i>Arnoglossus imperialis</i>    | 3  | 6  | 2 |
| <i>Pagrus pagrus</i>             | 4  | 8  | 2 |
| <i>Nessorhamphus ingolfianus</i> | 20 | 36 | 2 |
| <i>Macroparalepis affinis</i>    | 13 | 24 | 2 |
| <i>Peristedion cataphractum</i>  | 23 | 44 | 1 |
| <i>Diplecogaster bimaculata</i>  | 2  | 4  | 1 |
| <i>Lycodes gracilis</i>          | 5  | 11 | 1 |
| <i>Petromyzon marinus</i>        | 12 | 21 | 1 |
| <i>Ophichthus rufus</i>          | 38 | 72 | 1 |
| <i>Diplodus sargus</i>           | 9  | 16 | 1 |
| <i>Argyropelecus hemigymnus</i>  | 2  | 4  | 1 |
| <i>Argyropelecus gigas</i>       | 8  | 15 | 1 |
| <i>Echiostoma barbatum</i>       | 12 | 22 | 1 |
| <i>Cepola macrophthalmia</i>     | 3  | 8  | 1 |
| <i>Lestidiops jayakari</i>       | 11 | 21 | 1 |
| <i>Syngnathus rostellatus</i>    | 15 | 25 | 1 |
| <i>Chlorophthalmus agassizi</i>  | 6  | 11 | 1 |
| <i>Limanda limanda</i>           | 2  | 3  | 1 |
| <i>Spondyliosoma cantharus</i>   | 2  | 5  | 1 |
| <i>Mullus surmuletus</i>         | 3  | 5  | 1 |
| <i>Peristedion cataphractum</i>  | 12 | 23 | 1 |
| <i>Benthodesmus simonyi</i>      | 35 | 60 | 1 |
| <i>Scomberesox saurus</i>        | 28 | 49 | 1 |
| <i>Raniceps raninus</i>          | 5  | 9  | 1 |
| <i>Alepocephalus bairdii</i>     | 12 | 22 | 1 |
| <i>Rostroraja alba</i>           | 21 | 40 | 1 |
| <i>Pagrus auriga</i>             | 14 | 27 | 1 |
| <i>Callionymus reticulatus</i>   | 26 | 55 | 1 |
| <i>Lepidion eques</i>            | 5  | 8  | 1 |
| <i>Chaunax pictus</i>            | 8  | 14 | 1 |
| <i>Chelidonichthys lastoviza</i> | 6  | 10 | 1 |
| <i>Hippocampus hippocampus</i>   | 8  | 16 | 1 |
| <i>Scomberesox saurus</i>        | 15 | 28 | 1 |
| <i>Pleuronectes platessa</i>     | 3  | 5  | 1 |
| <i>Syngnathus rostellatus</i>    | 5  | 9  | 1 |
| <i>Polymetme thaeocoryla</i>     | 7  | 12 | 1 |
| <i>Myxine glutinosa</i>          | 7  | 12 | 1 |
| <i>Hoplostethus atlanticus</i>   | 6  | 12 | 1 |
| <i>Leptoclinus maculatus</i>     | 8  | 18 | 1 |
| <i>Paralepis coregonoides</i>    | 13 | 24 | 1 |
| <i>Zeugopterus regius</i>        | 14 | 25 | 1 |

|                                   |    |    |   |
|-----------------------------------|----|----|---|
| <i>Hippocampus hippocampus</i>    | 5  | 8  | 1 |
| <i>Ceratoscopelus maderensis</i>  | 6  | 11 | 1 |
| <i>Raja brachyura</i>             | 7  | 12 | 1 |
| <i>Liparis montagui</i>           | 16 | 30 | 1 |
| <i>Lycodes gracilis</i>           | 26 | 59 | 1 |
| <i>Parasudis fraserbrunneri</i>   | 12 | 21 | 1 |
| <i>Ciliata mustela</i>            | 4  | 7  | 1 |
| <i>Syngnathus typhle</i>          | 17 | 31 | 1 |
| <i>Cyclopterus lumpus</i>         | 3  | 6  | 1 |
| <i>Serranus cabrilla</i>          | 5  | 9  | 1 |
| <i>Squalus blainville</i>         | 13 | 25 | 1 |
| <i>Dipturus oxyrinchus</i>        | 16 | 28 | 1 |
| <i>Ciliata septentrionalis</i>    | 3  | 5  | 1 |
| <i>Osmerus eperlanus</i>          | 4  | 6  | 1 |
| <i>Galeus atlanticus</i>          | 8  | 15 | 1 |
| <i>Alepocephalus rostratus</i>    | 7  | 12 | 1 |
| <i>Centrolabrus exoletus</i>      | 6  | 10 | 1 |
| <i>Hydrolagus mirabilis</i>       | 7  | 13 | 1 |
| <i>Thunnus thynnus</i>            | 9  | 18 | 1 |
| <i>Echiodon drummondii</i>        | 41 | 91 | 1 |
| <i>Microchirus variegatus</i>     | 3  | 5  | 1 |
| <i>Stromateus fiatola</i>         | 8  | 15 | 1 |
| <i>Phycis phycis</i>              | 10 | 18 | 1 |
| <i>Chirostomias pliopterus</i>    | 12 | 22 | 1 |
| <i>Gobius paganellus</i>          | 5  | 9  | 1 |
| <i>Centroscyllium fabricii</i>    | 15 | 26 | 1 |
| <i>Argyroteleus olfersii</i>      | 2  | 4  | 1 |
| <i>Lumpenus lampraeformis</i>     | 3  | 8  | 1 |
| <i>Gadella maraldi</i>            | 6  | 11 | 1 |
| <i>Mustelus mustelus</i>          | 12 | 23 | 1 |
| <i>Parablennius gattorugine</i>   | 5  | 9  | 1 |
| <i>Polymetme corythaeola</i>      | 23 | 42 | 1 |
| <i>Epigonus telescopus</i>        | 5  | 9  | 1 |
| <i>Gaidropsarus mediterraneus</i> | 7  | 12 | 1 |
| <i>Gadiculus argenteus</i>        | 2  | 3  | 1 |
| <i>Symphodus melops</i>           | 5  | 9  | 1 |
| <i>Symphodus bailloni</i>         | 5  | 8  | 1 |
| <i>Xenodermichthys copei</i>      | 3  | 6  | 1 |
| <i>Trachyscorpia cristulata</i>   | 9  | 17 | 1 |
| <i>Carapus acus</i>               | 20 | 36 | 1 |
| <i>Pontinus kuhlii</i>            | 9  | 16 | 0 |
| <i>Entelurus aequoreus</i>        | 4  | 9  | 0 |
| <i>Molva molva</i>                | 7  | 12 | 0 |
| <i>Echiodon drummondii</i>        | 4  | 8  | 0 |
| <i>Cataetyx alleni</i>            | 12 | 22 | 0 |
| <i>Arnoglossus thori</i>          | 3  | 5  | 0 |

|                                    |    |    |   |
|------------------------------------|----|----|---|
| <i>Diretmus argenteus</i>          | 8  | 14 | 0 |
| <i>Sparus aurata</i>               | 5  | 9  | 0 |
| <i>Etmopterus pusillus</i>         | 13 | 24 | 0 |
| <i>Pagrus pagrus</i>               | 2  | 4  | 0 |
| <i>Lobianchia gemellarii</i>       | 6  | 11 | 0 |
| <i>Deania profundorum</i>          | 15 | 27 | 0 |
| <i>Gaidropsarus macrophthalmus</i> | 3  | 6  | 0 |
| <i>Pagellus bogaraveo</i>          | 5  | 9  | 0 |
| <i>Myctophum punctatum</i>         | 10 | 19 | 0 |
| <i>Remora brachyptera</i>          | 10 | 19 | 0 |
| <i>Symphodus roissali</i>          | 8  | 15 | 0 |
| <i>Gasterosteus aculeatus</i>      | 3  | 5  | 0 |
| <i>Microchirus theophila</i>       | 5  | 9  | 0 |
| <i>Spinachia spinachia</i>         | 9  | 16 | 0 |
| <i>Enchelyopus cimbrius</i>        | 4  | 7  | 0 |
| <i>Liparis liparis</i>             | 2  | 4  | 0 |
| <i>Scorpaena notata</i>            | 4  | 8  | 0 |
| <i>Gobiidae</i>                    | 11 | 20 | 0 |
| <i>Scophthalmus rhombus</i>        | 5  | 9  | 0 |
| <i>Chirolophis ascanii</i>         | 11 | 26 | 0 |
| <i>Liparis montagui</i>            | 2  | 4  | 0 |
| <i>Trisopterus luscus</i>          | 3  | 5  | 0 |
| <i>Howella brodiei</i>             | 9  | 17 | 0 |
| <i>Sebastes viviparus</i>          | 3  | 5  | 0 |
| <i>Zeugopterus norvegicus</i>      | 2  | 4  | 0 |
| <i>Sagamichthys schnakenbecki</i>  | 12 | 22 | 0 |
| <i>Sparus aurata</i>               | 9  | 16 | 0 |
| <i>Dentex maroccanus</i>           | 8  | 15 | 0 |
| <i>Raja undulata</i>               | 6  | 12 | 0 |
| <i>Hymenocephalus italicus</i>     | 4  | 7  | 0 |
| <i>Leptagonus decagonus</i>        | 9  | 18 | 0 |
| <i>Pagellus bellottii</i>          | 2  | 4  | 0 |
| <i>Leucoraja circularis</i>        | 7  | 13 | 0 |
| <i>Callionymus risso</i>           | 3  | 5  | 0 |
| <i>Searsia koefoedi</i>            | 9  | 17 | 0 |
| <i>Micrenophrys lilljeborgii</i>   | 10 | 18 | 0 |
| <i>Nerophis ophidion</i>           | 13 | 25 | 0 |
| <i>Chirolophis ascanii</i>         | 5  | 11 | 0 |
| <i>Alosa alosa</i>                 | 3  | 6  | 0 |
| <i>Uranoscopus scaber</i>          | 8  | 16 | 0 |
| <i>Squalus acanthias</i>           | 7  | 14 | 0 |
| <i>Ceratoscopelus maderensis</i>   | 3  | 6  | 0 |
| <i>Lithognathus mormyrus</i>       | 5  | 9  | 0 |
| <i>Ammodytes</i>                   | 4  | 7  | 0 |
| <i>Chaunax pictus</i>              | 4  | 8  | 0 |
| <i>Echiostoma barbatum</i>         | 7  | 12 | 0 |

|                                 |    |    |   |
|---------------------------------|----|----|---|
| <i>Carapus acus</i>             | 11 | 20 | 0 |
| <i>Poromitra capito</i>         | 9  | 17 | 0 |
| <i>Scyliorhinus stellaris</i>   | 7  | 13 | 0 |
| <i>Serranus hepatus</i>         | 2  | 4  | 0 |
| <i>Vinciguerrria poweriae</i>   | 5  | 9  | 0 |
| <i>Blennius ocellaris</i>       | 2  | 4  | 0 |
| <i>Artediellus atlanticus</i>   | 5  | 10 | 0 |
| <i>Taurulus bubalis</i>         | 3  | 5  | 0 |
| <i>Scorpaena scrofa</i>         | 4  | 8  | 0 |
| <i>Anarhichas lupus</i>         | 7  | 12 | 0 |
| <i>Zenion hololepis</i>         | 5  | 9  | 0 |
| <i>Paraliparis membranaceus</i> | 3  | 5  | 0 |
| <i>Gobius paganellus</i>        | 9  | 16 | 0 |
| <i>Phycis blennoides</i>        | 4  | 6  | 0 |
| <i>Myoxocephalus scorpius</i>   | 2  | 5  | 0 |
| <i>Howella brodiei</i>          | 5  | 9  | 0 |
| <i>Arctozenus risso</i>         | 4  | 7  | 0 |
| <i>Zeugopterus regius</i>       | 4  | 8  | 0 |
| <i>Dicentrarchus labrax</i>     | 5  | 10 | 0 |
| <i>Aphia minuta</i>             | 2  | 3  | 0 |
| <i>Leptoclinus maculatus</i>    | 18 | 41 | 0 |
| <i>Nezumia sclerorhynchus</i>   | 10 | 17 | 0 |
| <i>Notacanthus bonaparte</i>    | 5  | 10 | 0 |
| <i>Guttigadus latifrons</i>     | 7  | 12 | 0 |
| <i>Merluccius merluccius</i>    | 2  | 3  | 0 |
| <i>Maurolicus muelleri</i>      | 1  | 2  | 0 |
| <i>Torpedo marmorata</i>        | 4  | 7  | 0 |
| <i>Scyliorhinus canicula</i>    | 5  | 9  | 0 |
| <i>Paralepis coregonoides</i>   | 7  | 13 | 0 |
| <i>Argentina sphyraena</i>      | 2  | 3  | 0 |
| <i>Citharus linguatula</i>      | 2  | 3  | 0 |
| <i>Leptoclinus maculatus</i>    | 4  | 8  | 0 |
| <i>Poromitra crassiceps</i>     | 9  | 17 | 0 |
| <i>Cyttopsis rosea</i>          | 4  | 8  | 0 |
| <i>Benthoosema glaciale</i>     | 5  | 9  | 0 |
| <i>Coryphaenoides rupestris</i> | 5  | 8  | 0 |
| <i>Spratelloides lewisi</i>     | 3  | 6  | 0 |
| <i>Lampanyctus photonotus</i>   | 6  | 11 | 0 |
| <i>Diaphus dumerilii</i>        | 3  | 6  | 0 |
| <i>Evermannella balbo</i>       | 6  | 12 | 0 |
| <i>Brosme brosme</i>            | 10 | 19 | 0 |
| <i>Notoscopelus elongatus</i>   | 9  | 16 | 0 |
| <i>Scomber colias</i>           | 6  | 10 | 0 |
| <i>Monochirus hispidus</i>      | 4  | 8  | 0 |
| <i>Acantholabrus palloni</i>    | 5  | 9  | 0 |
| <i>Scymnodon ringens</i>        | 6  | 12 | 0 |

|                                     |    |    |   |
|-------------------------------------|----|----|---|
| <i>Lycenchelys sarsii</i>           | 7  | 10 | 0 |
| <i>Peristedion cataphractum</i>     | 7  | 12 | 0 |
| <i>Sprattus sprattus</i>            | 2  | 3  | 0 |
| <i>Micrenophrys lilljeborgii</i>    | 5  | 10 | 0 |
| <i>Nansenia tenera</i>              | 7  | 12 | 0 |
| <i>Hippoglossoides platessoides</i> | 2  | 3  | 0 |
| <i>Notoscopelus kroyeri</i>         | 3  | 5  | 0 |
| <i>Trisopterus esmarkii</i>         | 2  | 3  | 0 |
| <i>Hymenocephalus italicus</i>      | 2  | 4  | 0 |
| <i>Trisopterus minutus</i>          | 2  | 3  | 0 |
| <i>Syngnathus typhle</i>            | 9  | 17 | 0 |
| <i>Micrenophrys lilljeborgii</i>    | 3  | 5  | 0 |
| <i>Molva dypterygia</i>             | 8  | 15 | 0 |
| <i>Diplecogaster bimaculata</i>     | 1  | 2  | 0 |
| <i>Hippocampus guttulatus</i>       | 8  | 16 | 0 |
| <i>Lophius budegassa</i>            | 2  | 5  | 0 |
| <i>Lepidorhombus boscii</i>         | 2  | 3  | 0 |
| <i>Gadella maraldi</i>              | 4  | 6  | 0 |
| <i>Pollachius pollachius</i>        | 6  | 11 | 0 |
| <i>Benthoosema glaciale</i>         | 3  | 5  | 0 |
| <i>Lampanyctus crocodilus</i>       | 4  | 7  | 0 |
| <i>Labrus bergylta</i>              | 5  | 9  | 0 |
| <i>Alosa alosa</i>                  | 2  | 3  | 0 |
| <i>Molva molva</i>                  | 4  | 7  | 0 |
| <i>Brosme brosme</i>                | 6  | 10 | 0 |
| <i>Gaidropsarus biscayensis</i>     | 4  | 7  | 0 |
| <i>Dicologlossa cuneata</i>         | 3  | 6  | 0 |
| <i>Ctenolabrus rupestris</i>        | 3  | 5  | 0 |
| <i>Stomias boa</i>                  | 4  | 8  | 0 |
| <i>Arnoglossus rueppelii</i>        | 3  | 6  | 0 |
| <i>Alosa agone</i>                  | 5  | 9  | 0 |
| <i>Belone belone</i>                | 10 | 19 | 0 |
| <i>Chelidonichthys lucerna</i>      | 3  | 5  | 0 |
| <i>Raniceps raninus</i>             | 3  | 5  | 0 |
| <i>Microchirus ocellatus</i>        | 4  | 9  | 0 |
| <i>Macrourus berglax</i>            | 5  | 10 | 0 |
| <i>Brama brama</i>                  | 5  | 9  | 0 |
| <i>Chauliodus sloani</i>            | 6  | 10 | 0 |
| <i>Centrolophus niger</i>           | 7  | 12 | 0 |
| <i>Lepidotrigla cavillone</i>       | 3  | 5  | 0 |
| <i>Zeugopterus punctatus</i>        | 2  | 4  | 0 |
| <i>Sebastes mentella</i>            | 4  | 8  | 0 |
| <i>Gobius niger</i>                 | 3  | 5  | 0 |
| <i>Pagellus acarne</i>              | 3  | 5  | 0 |
| <i>Dysomma brevirostre</i>          | 11 | 20 | 0 |
| <i>Chelidonichthys cuculus</i>      | 3  | 6  | 0 |



|                                   |    |    |   |
|-----------------------------------|----|----|---|
| <i>Arnoglossus laterna</i>        | 2  | 4  | 0 |
| <i>Phycis phycis</i>              | 5  | 10 | 0 |
| <i>Nezumia aequalis</i>           | 1  | 2  | 0 |
| <i>Halargyreus johnsonii</i>      | 4  | 7  | 0 |
| <i>Bellottia apoda</i>            | 5  | 9  | 0 |
| <i>Gobiidae</i>                   | 5  | 10 | 0 |
| <i>Gnathophis mystax</i>          | 11 | 20 | 0 |
| <i>Glyptocephalus cynoglossus</i> | 2  | 4  | 0 |
| <i>Galeus melastomus</i>          | 4  | 8  | 0 |
| <i>Echiichthys vipera</i>         | 3  | 5  | 0 |
| <i>Anguilla anguilla</i>          | 6  | 10 | 0 |
| <i>Triglops murrayi</i>           | 2  | 5  | 0 |
| <i>Malacocephalus laevis</i>      | 2  | 4  | 0 |
| <i>Anguilla anguilla</i>          | 10 | 18 | 0 |
| <i>Micromesistius poutassou</i>   | 2  | 4  | 0 |
| <i>Callanthias ruber</i>          | 3  | 5  | 0 |
| <i>Sebastes mentella</i>          | 2  | 4  | 0 |
| <i>Epigonus denticulatus</i>      | 3  | 6  | 0 |
| <i>Setarches guentheri</i>        | 5  | 9  | 0 |
| <i>Notoscopelus bolini</i>        | 5  | 9  | 0 |
| <i>Conger conger</i>              | 7  | 12 | 0 |
| <i>Serranus scriba</i>            | 3  | 5  | 0 |
| <i>Trachinus draco</i>            | 3  | 6  | 0 |
| <i>Pagellus bogaraveo</i>         | 3  | 5  | 0 |
| <i>Molva macrophthalmia</i>       | 5  | 10 | 0 |
| <i>Lepadogaster lepadogaster</i>  | 2  | 4  | 0 |
| <i>Lepidopus caudatus</i>         | 7  | 14 | 0 |
| <i>Sander lucioperca</i>          | 5  | 10 | 0 |
| <i>Chlorophthalmus agassizi</i>   | 3  | 6  | 0 |
| <i>Arnoglossus imperialis</i>     | 2  | 3  | 0 |
| <i>Cubiceps gracilis</i>          | 5  | 9  | 0 |
| <i>Leucoraja naevus</i>           | 4  | 7  | 0 |
| <i>Ammodytes</i>                  | 2  | 4  | 0 |
| <i>Gaidropsarus mediterraneus</i> | 3  | 7  | 0 |
| <i>Etmopterus spinax</i>          | 4  | 7  | 0 |
| <i>Hippocampus hippocampus</i>    | 2  | 5  | 0 |
| <i>Echiodon drummondii</i>        | 2  | 4  | 0 |
| <i>Zeus faber</i>                 | 1  | 2  | 0 |
| <i>Argyropelecus aculeatus</i>    | 2  | 4  | 0 |
| <i>Alosa fallax</i>               | 3  | 6  | 0 |
| <i>Argyropelecus aculeatus</i>    | 4  | 8  | 0 |
| <i>Trachurus trachurus</i>        | 2  | 3  | 0 |
| <i>Lepidorhombus whiffiagonis</i> | 2  | 3  | 0 |
| <i>Squalus acanthias</i>          | 4  | 7  | 0 |
| <i>Alepocephalus rostratus</i>    | 4  | 7  | 0 |
| <i>Argyropelecus hemigymnus</i>   | 1  | 2  | 0 |

|                                  |   |    |   |
|----------------------------------|---|----|---|
| <i>Echiodon dentatus</i>         | 6 | 11 | 0 |
| <i>Pholis gunnellus</i>          | 4 | 7  | 0 |
| <i>Symphodus melops</i>          | 3 | 5  | 0 |
| <i>Trigla lyra</i>               | 3 | 5  | 0 |
| <i>Pomadasys incisus</i>         | 2 | 4  | 0 |
| <i>Polymetme thaeocoryla</i>     | 4 | 7  | 0 |
| <i>Acantholabrus palloni</i>     | 3 | 5  | 0 |
| <i>Electrona risso</i>           | 4 | 7  | 0 |
| <i>Symphurus nigrescens</i>      | 3 | 6  | 0 |
| <i>Labrus mixtus</i>             | 3 | 6  | 0 |
| <i>Amblyraja radiata</i>         | 3 | 6  | 0 |
| <i>Scomber scombrus</i>          | 3 | 6  | 0 |
| <i>Syngnathus rostellatus</i>    | 3 | 5  | 0 |
| <i>Galeus melastomus</i>         | 2 | 4  | 0 |
| <i>Epigonus constanciae</i>      | 3 | 6  | 0 |
| <i>Cepola macrophthalmia</i>     | 1 | 3  | 0 |
| <i>Micrenophrys lilljeborgii</i> | 2 | 3  | 0 |
| <i>Lobianchia dofleini</i>       | 3 | 5  | 0 |
| <i>Lobianchia gemellarii</i>     | 3 | 6  | 0 |
| <i>Symphodus bailloni</i>        | 3 | 5  | 0 |
| <i>Lophius piscatorius</i>       | 2 | 4  | 0 |
| <i>Capros aper</i>               | 1 | 1  | 0 |
| <i>Bathysolea profundicola</i>   | 4 | 7  | 0 |
| <i>Arnoglossus thori</i>         | 2 | 3  | 0 |
| <i>Alepocephalus bairdii</i>     | 4 | 7  | 0 |
| <i>Callionymus lyra</i>          | 1 | 2  | 0 |
| <i>Microstomus kitt</i>          | 2 | 3  | 0 |
| <i>Spicara maena</i>             | 3 | 5  | 0 |
| <i>Nezumia sclerorhynchus</i>    | 3 | 5  | 0 |
| <i>Nezumia sclerorhynchus</i>    | 5 | 10 | 0 |
| <i>Solea solea</i>               | 3 | 6  | 0 |
| <i>Synaphobranchus kaupii</i>    | 4 | 7  | 0 |
| <i>Cubiceps gracilis</i>         | 3 | 5  | 0 |
| <i>Spinachia spinachia</i>       | 3 | 5  | 0 |
| <i>Helicolenus dactylopterus</i> | 1 | 3  | 0 |
| <i>Apletodon dentatus</i>        | 2 | 3  | 0 |
| <i>Hyperoplus lanceolatus</i>    | 2 | 4  | 0 |
| <i>Phycis blennoides</i>         | 2 | 4  | 0 |
| <i>Raja clavata</i>              | 2 | 4  | 0 |
| <i>Chelidonichthys cuculus</i>   | 1 | 2  | 0 |
| <i>Liparis liparis</i>           | 1 | 1  | 0 |
| <i>Bathysolea profundicola</i>   | 1 | 2  | 0 |
| <i>Nerophis lumbriciformis</i>   | 6 | 13 | 0 |
| <i>Callionymus maculatus</i>     | 1 | 3  | 0 |
| <i>Xenodermichthys copei</i>     | 2 | 3  | 0 |
| <i>Chelidonichthys obscurus</i>  | 2 | 3  | 0 |

|                                  |    |    |   |
|----------------------------------|----|----|---|
| <i>Nerophis lumbriciformis</i>   | 13 | 25 | 0 |
| <i>Coelorinchus caelorhincus</i> | 1  | 2  | 0 |
| <i>Nerophis ophidion</i>         | 6  | 13 | 0 |
| <i>Hoplostethus atlanticus</i>   | 1  | 2  | 0 |
| <i>Peristedion cataphractum</i>  | 3  | 7  | 0 |
| <i>Ceratospiculus maderensis</i> | 2  | 3  | 0 |
| <i>Coryphaenoides rupestris</i>  | 3  | 5  | 0 |
| <i>Monochirus hispidus</i>       | 1  | 2  | 0 |
| <i>Syngnathus typhle</i>         | 5  | 9  | 0 |
| <i>Sprattus sprattus</i>         | 1  | 2  | 0 |
| <i>Zeugopterus norvegicus</i>    | 1  | 2  | 0 |
| <i>Nezumia bairdii</i>           | 2  | 4  | 0 |
| <i>Agonus cataphractus</i>       | 1  | 2  | 0 |
| <i>Bathysolea profundicola</i>   | 2  | 4  | 0 |
| <i>Entelurus aequoreus</i>       | 2  | 4  | 0 |
| <i>Callionymus reticulatus</i>   | 1  | 3  | 0 |
| <i>Ctenolabrus rupestris</i>     | 1  | 3  | 0 |
| <i>Gobiidae</i>                  | 1  | 3  | 0 |
| <i>Anguilla anguilla</i>         | 3  | 6  | 0 |
| <i>Sardina pilchardus</i>        | 2  | 3  | 0 |
| <i>Callionymus risso</i>         | 1  | 3  | 0 |
| <i>Diaphus dumerilii</i>         | 2  | 3  | 0 |
| <i>Syngnathus acus</i>           | 2  | 4  | 0 |
| <i>Hymenocephalus italicus</i>   | 1  | 2  | 0 |
| <i>Nezumia aequalis</i>          | 1  | 1  | 0 |
| <i>Malacocephalus laevis</i>     | 1  | 1  | 0 |
| <i>Microchirus variegatus</i>    | 1  | 2  | 0 |
| <i>Trisopterus minutus</i>       | 1  | 2  | 0 |
| <i>Argyropelecus olfersii</i>    | 1  | 1  | 0 |
| <i>Zeus faber</i>                | 1  | 1  | 0 |
| <i>Arnoglossus laterna</i>       | 1  | 2  | 0 |
| <i>Arnoglossus laterna</i>       | 1  | 1  | 0 |
| <i>Pholis gunnellus</i>          | 1  | 2  | 0 |
| <i>Conger conger</i>             | 2  | 4  | 0 |
| <i>Gobiidae</i>                  | 1  | 2  | 0 |
| <i>Malacocephalus laevis</i>     | 1  | 2  | 0 |
| <i>Maurolicus muelleri</i>       | 1  | 1  | 0 |
| <i>Trachurus trachurus</i>       | 1  | 2  | 0 |
| <i>Merluccius merluccius</i>     | 1  | 1  | 0 |
| <i>Sardina pilchardus</i>        | 1  | 2  | 0 |
| <i>Nezumia bairdii</i>           | 1  | 1  | 0 |
| <i>Coelorinchus caelorhincus</i> | 1  | 1  | 0 |
| <i>Squalus acanthias</i>         | 1  | 1  | 0 |
| <i>Raja clavata</i>              | 1  | 1  | 0 |

1  
2

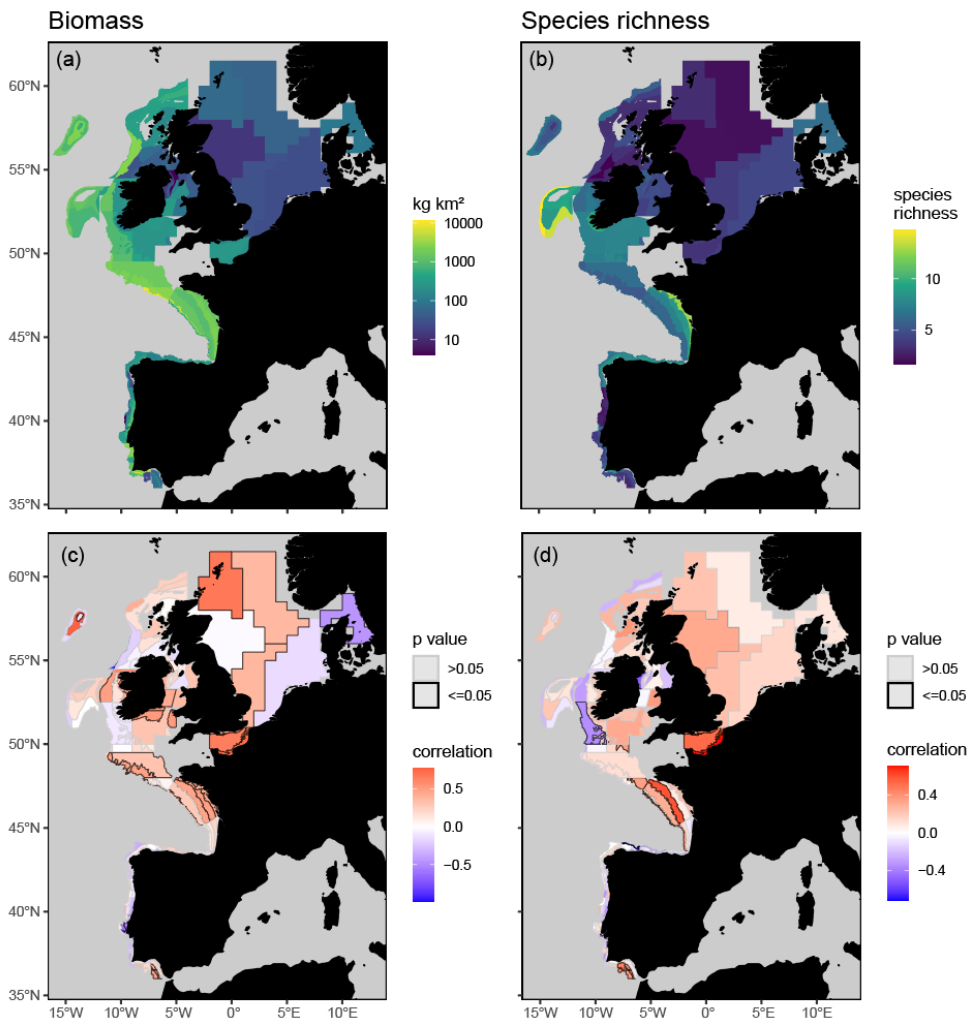

1  
 2 Figure S5: Mean spatial distribution (a, b) and temporal change (c, d) in unclassified fish biomass (a, c)  
 3 and species richness (b, d) by assessment strata based on otter trawl data. Temporal increases and  
 4 decreases are shown by red and blue cells, respectively (Kendall's  $\tau$  scores of  $-1$  to  $+1$  represent a  
 5 100% probability of a decreasing or increasing trend, respectively). Assessment strata where the  
 6 temporal change (correlation) is significant are highlighted with black borders.  
 7
